# Supplementary material for: Identification of proteins involved in the anti-inflammatory properties of Propionibacterium freudenreichii by means of a multi-strain study
Source: PubMed Central journal article supplement (PMC5390290; doi:10.1038/srep46409), 2017-04-13
Supplement: srep46409-s1.pdf [file srep46409-s1.pdf]

## Supplementary Data

### Identification of proteins involved in the anti-inflammatory properties of *Propionibacterium freudenreichii* by means of a multi-strain study

Stéphanie-Marie Deutsch<sup>1\*</sup>, Mahendra Mariadassou<sup>2</sup>, Pierre Nicolas<sup>2</sup>, Sandrine Parayre<sup>1</sup>, Rozenn Le Guellec<sup>1</sup>, Victoria Chuat<sup>1</sup>, Vincent Peton<sup>1</sup>, Caroline Le Maréchal<sup>1</sup>, Julien Burati<sup>2</sup>, Valentin Loux<sup>2</sup>, Valérie Briard-Bion<sup>1</sup>, Julien Jardin<sup>1</sup>, Coline Plé<sup>3</sup>, Benoît Foligné<sup>3</sup>, Gwénaél Jan<sup>1§</sup> & Hélène Falentin<sup>1§</sup>

\*Corresponding author

contact information of corresponding author: [stephanie-marie.deutsch@inra.fr](mailto:stephanie-marie.deutsch@inra.fr)

§share credit as senior co-authors

<sup>1</sup>STLO, UMR1253, INRA, Agrocampus Ouest, 35000, Rennes, France

<sup>2</sup>MaIAGE, UR1404, INRA, 78352 Jouy-en-Josas, France

<sup>3</sup>Univ. Lille, CNRS, Inserm, CHU Lille, Institut Pasteur de Lille, U1019 – UMR 8204 - CIIL - Center for Infection and Immunity of Lille, 59000 Lille, France

## Supplementary Data

### Supplementary Table S1: Strains of *Propionibacterium freudenreichii* and their derivatives

The sequences are deposited in the EMBL database and are publicly available. NS: not sequenced. CIRM-BIA: Centre International de Ressources Microbiennes – Bactéries d’Intérêt Alimentaire, INRA, UMR 1253, Science et Technologie du Lait et de l’Œuf, Rennes, France – abbreviated in the texte as “CIRM”. ITG: Actalia collection (Rennes, France). LS: Laboratoire Standa Collection (Laboratoires Standa, Caen, France)

| Strain or plasmid        | Other Name | Relevant genotype and phenotype | Reference            | Bioproject number |
|--------------------------|------------|---------------------------------|----------------------|-------------------|
| <i>P. freudenreichii</i> |            |                                 |                      |                   |
| CIRM-BIA 1               |            | Wild type, type strain          | Falentin et al. 2010 | FN806773          |
| CIRM-BIA 9               |            | Wild type                       | Loux et al. 2015     | PRJEB6427         |
| CIRM-BIA 118             |            | Wild type                       | Loux et al. 2015     | PRJEB6428         |
| CIRM-BIA 119             |            | Wild type                       | Loux et al. 2015     | PRJEB6430         |
| CIRM-BIA 121             |            | Wild type                       | Loux et al. 2015     | PRJEB6431         |
| CIRM-BIA 122             |            | Wild type                       | Loux et al. 2015     | PRJEB6432         |
| CIRM-BIA 123             |            | Wild type                       | Loux et al. 2015     | PRJEB6438         |
| CIRM-BIA 125             | ITG P14    | Wild type                       | Loux et al. 2015     | PRJEB6434         |
| CIRM-BIA 127             | ITG P18    | Wild type                       | Loux et al. 2015     | PRJEB6435         |
| CIRM-BIA129              | ITG P20    | Wild type                       | Le Maréchal et al    | PRJEB4826         |
| CIRM-BIA 131             | LS 408     | Wild Type                       | This work            | Not available     |
| CIRM-BIA134              |            | Wild type                       | Loux et al. 2015     | PRJEB6441         |
| CIRM-BIA135              |            | Wild type                       | Loux et al. 2015     | PRJEB6442         |
| CIRM-BIA 136             | TL 1348    | Wild Type                       | This work            | Not available     |
| CIRM-BIA138              | ITG P9     | Wild type                       | Loux et al. 2015     | PRJEB6433         |
| CIRM-BIA139              | ITG P23    | Wild type                       | Loux et al. 2015     | PRJEB6436         |
| CIRM-BIA 456             |            | Wild type                       | Loux et al. 2015     | PRJEB6445         |
| CIRM-BIA 508             |            | Wild type                       | Loux et al. 2015     | PRJEB6429         |

|                                 |                                                                         |                  |           |
|---------------------------------|-------------------------------------------------------------------------|------------------|-----------|
| CIRM-BIA 512                    | Wild type                                                               | Loux et al. 2015 | PRJEB6439 |
| CIRM-BIA 513                    | Wild type                                                               | Loux et al. 2015 | PRJEB6440 |
| CIRM-BIA 514                    | Wild type                                                               | Loux et al. 2015 | PRJEB6443 |
| CIRM-BIA 516                    | Wild type                                                               | Loux et al. 2015 | PRJEB6444 |
| CIRM-BIA 527                    | Wild type                                                               | Loux et al. 2015 | PRJEB6437 |
| CIRM-BIA129-KO- <i>slpB</i>     | Inactivation of the gene <i>slpB</i><br>in strain CIRM-BIA 129          | This work        |           |
| CIRM-BIA129-KO- <i>slpE</i>     | Inactivation of the gene <i>slpE</i><br>in strain CIRM-BIA 129          | This work        |           |
| CIRM-BIA129-KO- <i>slpF</i>     | Inactivation of the gene <i>slpF</i><br>in strain CIRM-BIA 129          | This work        |           |
| CIRM-BIA129-KO- <i>hsdM3</i>    | Inactivation of the gene<br><i>hsdM3</i> in strain CIRM-BIA<br>129      | This work        |           |
| CIRM-BIA129-KO- <i>pep</i>      | Inactivation of the gene<br><i>pouf10925</i> in strain CIRM-<br>BIA 129 | This work        |           |
| CIRM-BIA121-KO- <i>enol</i>     | Inactivation of the gene <i>enol</i><br>in strain CIRM-BIA 121          | This work        |           |
| CIRM-BIA121-KO- <i>htrA4</i>    | Inactivation of the gene<br><i>htrA4</i> in strain CIRM-BIA<br>121      | This work        |           |
| CIRM-BIA121-KO- <i>pouf8235</i> | Inactivation of the gene<br><i>pouf8235</i> in strain CIRM-<br>BIA 121  | This work        |           |

---

**Supplementary Table S2: Plasmids used in the work**

| <b>Plasmids</b>          | <b>Genotype</b>                                                                                                   | <b>Reference</b>      |
|--------------------------|-------------------------------------------------------------------------------------------------------------------|-----------------------|
| pPK705                   | <i>E. coli</i> - <i>P. freudenreichii</i> shuttle vector, carrying ampicillin resistance gene                     | Kiatpapan et al. 2000 |
| pUC:CmR                  | pUC18 carrying chloramphenicol resistance gene                                                                    | Deutsch et al. 2010   |
| PUC:CmR: <i>slpB</i>     | pUC18 carrying chloramphenicol resistance gene and a truncated fragment of <i>slpB</i> of strain CIRM-BIA 129     | This work             |
| PUC:CmR: <i>slpE</i>     | pUC18 carrying chloramphenicol resistance gene and a truncated fragment of <i>slpE</i> of strain CIRM-BIA 129     | This work             |
| PUC:CmR: <i>slpF</i>     | pUC18 carrying chloramphenicol resistance gene and a truncated fragment of <i>slpF</i> of strain CIRM-BIA 129     | This work             |
| PUC:CmR: <i>hsdM3</i>    | pUC18 carrying chloramphenicol resistance gene and a truncated fragment of <i>hsdM3</i> of strain CIRM-BIA 129    | This work             |
| PUC:CmR: <i>pep</i>      | pUC18 carrying chloramphenicol resistance gene and a truncated fragment of <i>slpE</i> of strain CIRM-BIA 129     | This work             |
| PUC:CmR: <i>eno1</i>     | pUC18 carrying chloramphenicol resistance gene and a truncated fragment of <i>eno1</i> of strain CIRM-BIA 121     | This work             |
| PUC:CmR: <i>htrA4</i>    | pUC18 carrying chloramphenicol resistance gene and a truncated fragment of <i>htrA4</i> of strain CIRM-BIA 121    | This work             |
| PUC:CmR: <i>pouf8235</i> | pUC18 carrying chloramphenicol resistance gene and a truncated fragment of <i>pouf8235</i> of strain CIRM-BIA 121 | This work             |

**Supplementary Table S3: Primers used in the study**

| Name                            | Sequence (5' to 3')                       | Size of amplicon (bp) | Application                                                          |
|---------------------------------|-------------------------------------------|-----------------------|----------------------------------------------------------------------|
| PFCIRM129_00700_slpB_HindIII_F  | ACACAA <u>AGCTT</u> AACTACTCGCCACCAACAC   | 574                   | Amplification of the internal fragment of the gene to be inactivated |
| PFCIRM129_00700_slpB_HindIII_R  | ACACAA <u>AGCTT</u> CACTCAGGCGGTAGAGGAAC  |                       |                                                                      |
| PFCIRM129_05460_slpE_HindIII_F  | ACACAA <u>AGCTT</u> CTCTGGAACCAGCGAGTAGC  | 570                   |                                                                      |
| PFCIRM129_05460_slpE_HindIII_R  | ACACAA <u>AGCTT</u> CTTCGCCAGCAAATATCAT   |                       |                                                                      |
| PFCIRM129_00525_hsdM3_HindIII_F | ACACAA <u>AGCTT</u> GTCCGACTACTCGCAACACA  | 599                   |                                                                      |
| PFCIRM129_00525_hsdM3_HindIII_R | ACACAA <u>AGCTT</u> GGAACAACAGCTCCGTCTTC  |                       |                                                                      |
| PFCIRM129_10925_pep_HindIII_F   | ACACAA <u>AGCTT</u> TATCCGACGATGACTTCCAC  | 553                   |                                                                      |
| PFCIRM129_10925_pep_HindIII_R   | ACACAA <u>AGCTT</u> TATAGGTGTGAACGGGCTGAC |                       |                                                                      |
| PFCIRM129_01545_slpF_HindIII_F  | ACACAA <u>AGCTT</u> ACGGCTATGACACCGAGTTC  | 544                   |                                                                      |
| PFCIRM129_01545_slpF_HindIII_R  | ACACAA <u>AGCTT</u> TGTGATCTTCTGCCATCGTT  |                       |                                                                      |
| PFCIRM121_10305_eno1_HindIII_F  | ACACAA <u>AGCTT</u> GAGGTTGAGGTCGTTCTGGA  | 586                   |                                                                      |
| PFCIRM121_10305_eno1_HindIII_R  | ACACAA <u>AGCTT</u> CACGGTTGTTGTCGAGGTTG  |                       |                                                                      |
| PFCIRM121_08235_pouf_HindIII_F  | ACACAA <u>AGCTT</u> GACACCTACGCCGAGTTGAT  | 531                   |                                                                      |
| PFCIRM121_08235_pouf_HindIII_R  | ACACAA <u>AGCTT</u> TGTGCTCGACCTTCTTCTTGC |                       |                                                                      |
| PFCIRM121_07195_htrA4_HindIII_F | ACACAA <u>AGCTT</u> TTCGTGCTGACGAACTACCAC | 513                   |                                                                      |
| PFCIRM121_07195_htrA4_HindIII_R | ACACAA <u>AGCTT</u> CCGAAGGTTTCATTCCTTGAG |                       |                                                                      |
| Cm_F-NsiI                       | ACACA <u>ATGCAT</u> TGGGTCATCAATTGGCCTC   | 1513                  | PCR detection of the chloramphenicol gene                            |
| Cm_R-NsiI                       | ACACA <u>ATGCAT</u> CGTCACACCCGAACATGTCG  | 1513                  |                                                                      |

The underlined sequences indicate the position of the restriction sites

**Deutsch et al.,**  
**Identification of proteins involved in the anti-inflammatory properties**  
**of *Propionibacterium freudenreichii* by means of a multi-strain study**

**Supplementary Table S4:** surface proteome of 12 strains of *Propionibacterium freudenreichii* identified by nano -LC-MS/MS.

Proteins were identified after *in situ* fluorescence labelling using CyDye DIGE Fluor Cy5 minimal dye (CyDye)

or after enzymatic shaving with trypsin (Shaving) or after Guanidine Hydrochloride extraction (ClGua).

Proteins molecular weights were automatically predicted from the corresponding genes on the Agmial annotation platform.

Coverage of a protein is calculated as the percentage of the amino acid sequence included in the identified peptides.

e-value is the number of times a given peptide score will be achieved by incorrect matches from a database search.

Protein identifications were automatically validated when they showed at least two unique peptides with an e-value below 0.05 corresponding to  $\log(e\text{-value}) < -1.30$

| Locus Tag       | Cluster | Method  | Description                                                                     | Function                                             | Gene name | SurfG+ Predicted Localization | Molecular Weight (Da) | log(E value) | Coverage (%) | Number Of Unique Peptides |
|-----------------|---------|---------|---------------------------------------------------------------------------------|------------------------------------------------------|-----------|-------------------------------|-----------------------|--------------|--------------|---------------------------|
| PFCIRM129_03920 | 1       | CyDye   | Pyridine nucleotide-disulphide oxidoreductase                                   | Metabolism of coenzymes and prosthetic groups        | merA      | CYTO                          | 48,100                | -17,222      | 17           | 5                         |
| PFCIRM456_07275 | 1       | CyDye   | Pyridine nucleotide-disulphide oxidoreductase                                   | Metabolism of coenzymes and prosthetic groups        | merA      | CYTO                          | 48,200                | -49,444      | 38           | 12                        |
| PFCIRM129_11210 | 31      | CyDye   | ATPase component, SufC<br>ABC-type transport involved in Fe-S cluster assembly, | Transport/binding proteins and lipoproteins          | sufC      | CYTO                          | 26,800                | -25,249      | 30           | 6                         |
| PFCIRM134_03605 | 31      | CyDye   | ATPase component, SufC<br>ABC-type transport involved in Fe-S cluster assembly, | Transport/binding proteins and lipoproteins          | sufC      | CYTO                          | 26,800                | -36,356      | 48           | 8                         |
| PFCIRM139_12255 | 31      | CyDye   | ATPase component, SufC                                                          | Transport/binding proteins and lipoproteins          | sufC      | CYTO                          | 26,800                | -34,713      | 41           | 7                         |
| PFCIRM516_00960 | 33      | Shaving | FeS assembly protein SufD                                                       | Transport/binding proteins and lipoproteins          | sufD      | CYTO                          | 43,800                | -7,985       | 6            | 2                         |
| PFCIRM122_11925 | 34      | CyDye   | FeS assembly protein SufB                                                       |                                                      | sufB      | CYTO                          | 53,800                | -78,041      | 51           | 20                        |
| PFCIRM129_11225 | 34      | CyDye   | FeS assembly protein SufB                                                       |                                                      | sufB      | CYTO                          | 53,800                | -35,005      | 31           | 8                         |
| PFCIRM134_03620 | 34      | CyDye   | FeS assembly protein SufB                                                       |                                                      | sufB      | CYTO                          | 53,800                | -89,249      | 59           | 22                        |
| PFCIRM1_03980   | 34      | CyDye   | FeS assembly protein SufB                                                       |                                                      | sufB      | CYTO                          | 53,800                | -44,205      | 31           | 11                        |
| PFCIRM118_03895 | 34      | CyDye   | FeS assembly protein SufB                                                       |                                                      | sufB      | CYTO                          | 53,800                | -127,340     | 66           | 23                        |
| PFCIRM138_01515 | 34      | CyDye   | FeS assembly protein SufB                                                       |                                                      | sufB      | CYTO                          | 53,800                | -51,576      | 31           | 11                        |
| PFCIRM122_11855 | 47      | CyDye   | triosephosphate isomerase 1                                                     | Main glycolytic pathways                             | tpi1      | CYTO                          | 27,500                | -36,419      | 47           | 9                         |
| PFCIRM139_12175 | 47      | CyDye   | triosephosphate isomerase 1                                                     | Main glycolytic pathways                             | tpi1      | CYTO                          | NA                    | -41,988      | NA           | 10                        |
| PFCIRM1_04045   | 47      | CyDye   | triosephosphate isomerase 1                                                     | Main glycolytic pathways                             | tpi1      | CYTO                          | 27,500                | -23,002      | 26           | 4                         |
| PFCIRM1_04050   | 48      | CyDye   | Phosphoglycerate kinase                                                         | Main glycolytic pathways                             | pgk       | CYTO                          | 42,300                | -15,754      | 8            | 2                         |
| PFCIRM118_03965 | 48      | CyDye   | Phosphoglycerate kinase                                                         | Main glycolytic pathways                             | pgk       | CYTO                          | 42,300                | -80,545      | 48           | 14                        |
| PFCIRM138_01585 | 48      | CyDye   | Phosphoglycerate kinase                                                         | Main glycolytic pathways                             | pgk       | CYTO                          | 42,300                | -33,513      | 21           | 6                         |
| PFCIRM122_11845 | 49      | CyDye   | Erythrose 4 phosphate dehydrogenase<br>Glyceraldehyde-3-phosphate dehydrogenase | Main glycolytic pathways                             | gap       | CYTO                          | 37,700                | -10,608      | 11           | 3                         |
| PFCIRM138_01590 | 49      | CyDye   | Erythrose 4 phosphate dehydrogenase                                             | Main glycolytic pathways                             | gap       | CYTO                          | 37,700                | -15,688      | 16           | 4                         |
| PFCIRM134_03795 | 69      | Shaving | 30S ribosomal protein S1<br>Aldehyde dehydrogenase                              | Ribosomal proteins<br>Metabolism of carbohydrates    | rpsA      | CYTO                          | 53,500                | -6,574       | 5            | 2                         |
| PFCIRM456_08210 | 70      | CyDye   | (Succinate-semialdehyde dehydrogenase)<br>Aldehyde dehydrogenase                | And related molecules<br>Metabolism of carbohydrates | gab       | CYTO                          | 52,200                | -14,281      | 11           | 4                         |
| PFCIRM118_04075 | 70      | CyDye   | (Succinate-semialdehyde dehydrogenase)                                          | And related molecules                                | gab       | CYTO                          | 52,200                | -63,918      | 42           | 12                        |
| PFCIRM129_11455 | 78      | CyDye   | Hypothetical protein                                                            | Pouf similar to proteins from other organisms        |           | CYTO                          | 36,400                | -60,186      | 34           | 11                        |
| PFCIRM134_03845 | 78      | CyDye   | Hypothetical protein                                                            | Pouf similar to proteins from other organisms        |           | CYTO                          | 36,400                | -44,611      | 32           | 11                        |
| PFCIRM516_01190 | 78      | CyDye   | Hypothetical protein                                                            | Pouf similar to proteins from other organisms        |           | CYTO                          | 36,400                | -39,465      | 27           | 8                         |
| PFCIRM118_04120 | 78      | Shaving | Hypothetical protein                                                            | Pouf similar to proteins from other organisms        |           | CYTO                          | 36,400                | -26,584      | 27           | 5                         |
| PFCIRM129_11455 | 78      | Shaving | Hypothetical protein                                                            | Pouf similar to proteins from other organisms        |           | CYTO                          | 36,400                | -11,347      | 8            | 2                         |
| PFCIRM134_03845 | 78      | Shaving | Hypothetical protein                                                            | Pouf similar to proteins from other organisms        |           | CYTO                          | 36,400                | -11,965      | 8            | 2                         |
| PFCIRM1_04205   | 78      | Shaving | Hypothetical protein                                                            | Pouf similar to proteins from other organisms        |           | CYTO                          | 36,400                | -12,537      | 13           | 3                         |
| PFCIRM134_03910 | 91      | Shaving | Cell division protein FtsI (penicillin-binding protein 2)                       | Cell wall                                            | ftsI      | PSE                           | NA                    | -10,600      | NA           | 2                         |
| PFCIRM514_04610 | 91      | Shaving | Cell division protein FtsI (penicillin-binding protein 2)                       | Cell wall                                            | ftsI      | PSE                           | 71,800                | -5,917       | 4            | 2                         |

| Locus Tag       | Cluster | Method  | Description                                              | Function                                        | Gene name    | SurfG+ Predicted Localization | Molecular Weight (Da) | log(E value) | Coverage (%) | Number Of Unique Peptides |
|-----------------|---------|---------|----------------------------------------------------------|-------------------------------------------------|--------------|-------------------------------|-----------------------|--------------|--------------|---------------------------|
| PFCIRM121_01110 | 111     | Shaving | Peptidase M23B family / metalloendopeptidase             | Cell envelope and cellular processes            |              | SECRETED                      | 38,900                | -28,569      | 27           | 6                         |
| PFCIRM122_11535 | 111     | Shaving | Peptidase M23B family / metalloendopeptidase             | Cell envelope and cellular processes            |              | SECRETED                      | 38,900                | -26,024      | 27           | 6                         |
| PFCIRM134_04010 | 111     | Shaving | Peptidase M23B family / metalloendopeptidase             | Cell envelope and cellular processes            |              | SECRETED                      | 38,900                | -9,303       | 10           | 2                         |
| PFCIRM139_11840 | 111     | Shaving | Peptidase M23B family / metalloendopeptidase             | Cell envelope and cellular processes            |              | SECRETED                      | 38,900                | -24,734      | 20           | 4                         |
| PFCIRM456_08000 | 111     | Shaving | Peptidase M23B family / metalloendopeptidase             | Cell envelope and cellular processes            |              | SECRETED                      | 38,900                | -44,876      | 34           | 9                         |
| PFCIRM514_04510 | 111     | Shaving | Peptidase M23B family / metalloendopeptidase             | Cell envelope and cellular processes            |              | SECRETED                      | 38,900                | -16,534      | 22           | 5                         |
| PFCIRM516_01355 | 111     | Shaving | Peptidase M23B family / metalloendopeptidase             | Cell envelope and cellular processes            |              | SECRETED                      | 38,900                | -10,381      | 18           | 3                         |
| PFCIRM527_00510 | 111     | Shaving | Peptidase M23B family / metalloendopeptidase             | Cell envelope and cellular processes            |              | SECRETED                      | 38,900                | -33,801      | 27           | 7                         |
| PFCIRM1_04370   | 111     | Shaving | Peptidase M23B family / metalloendopeptidase             | Cell envelope and cellular processes            |              | SECRETED                      | 38,900                | -25,288      | 28           | 6                         |
| PFCIRM138_01925 | 114     | CyDye   | Hypothetical protein                                     | Pouf similar to proteins from other organisms   |              | CYTO                          | 35,800                | -18,925      | 19           | 5                         |
| PFCIRM1_04560   | 142     | CyDye   | Cysteine synthase 1                                      | Metabolism of amino acids and related molecules | <b>cys1</b>  | CYTO                          | 31,600                | -16,295      | 20           | 5                         |
| PFCIRM118_06945 | 142     | CyDye   | Cysteine synthase 1                                      | Metabolism of amino acids and related molecules | <b>cys1</b>  | CYTO                          | 31,600                | -25,408      | 29           | 7                         |
| PFCIRM138_11065 | 142     | CyDye   | Cysteine synthase 1                                      | Metabolism of amino acids and related molecules | <b>cys1</b>  | CYTO                          | 31,600                | -28,502      | 29           | 7                         |
| PFCIRM527_05615 | 142     | CyDye   | Cysteine synthase 1                                      | Metabolism of amino acids and related molecules | <b>cys1</b>  | CYTO                          | 31,600                | -24,512      | 26           | 6                         |
| PFCIRM121_06290 | 146     | Shaving | Hypothetical protein                                     | Pouf, without similarity to other proteins      |              | PSE                           | 58,300                | -8,429       | 7            | 3                         |
| PFCIRM122_08215 | 146     | Shaving | Hypothetical protein                                     | Pouf, without similarity to other proteins      |              | PSE                           | 58,600                | -11,410      | 9            | 3                         |
| PFCIRM139_04205 | 146     | Shaving | Hypothetical protein                                     | Pouf, without similarity to other proteins      |              | PSE                           | 58,600                | -9,710       | 8            | 3                         |
| PFCIRM527_05635 | 146     | Shaving | Hypothetical protein                                     | Pouf, without similarity to other proteins      |              | PSE                           | 58,600                | -6,553       | 5            | 2                         |
| PFCIRM516_06130 | 150     | CyDye   | Inosine-5 -monophosphate dehydrogenase                   | Metabolism of nucleotides and nucleic acids     | <b>guaB1</b> | CYTO                          | 53,800                | -42,000      | 24           | 8                         |
| PFCIRM1_04600   | 150     | CyDye   | Inosine-5 -monophosphate dehydrogenase                   | Metabolism of nucleotides and nucleic acids     | <b>guaB1</b> | CYTO                          | 53,800                | -29,271      | 15           | 5                         |
| PFCIRM122_00690 | 193     | CyDye   | D-alanine--D-alanine ligase (D-alanylalanine synthetase) | Cell wall                                       | <b>ddlA</b>  | CYTO                          | NA                    | -6,018       | NA           | 2                         |
| PFCIRM456_03370 | 193     | CyDye   | D-alanine--D-alanine ligase (D-alanylalanine synthetase) | Cell wall                                       | <b>ddlA</b>  | CYTO                          | 40,400                | -9,173       | 10           | 3                         |
| PFCIRM516_04805 | 193     | CyDye   | D-alanine--D-alanine ligase (D-alanylalanine synthetase) | Cell wall                                       | <b>ddlA</b>  | CYTO                          | 40,400                | -16,534      | 17           | 5                         |
| PFCIRM129_04355 | 200     | CyDye   | Sua5_yciO_yrdC                                           | Translation initiation                          |              | CYTO                          | 22,600                | -15,358      | 16           | 3                         |
| PFCIRM456_02925 | 231     | Shaving | Hypothetical protein                                     | Pouf similar to proteins from other organisms   |              | PSE                           | 25,800                | -7,029       | 12           | 2                         |
| PFCIRM139_08140 | 241     | Shaving | Acetolactate synthase subunit small                      | Metabolism of amino acids and related molecules | <b>ilvN</b>  | CYTO                          | 54,100                | -7,347       | 5            | 2                         |
| PFCIRM139_01090 | 250     | CyDye   | surface layer protein A (S-layer protein A)              | Cell wall                                       | <b>slpA</b>  | PSE                           | 58,300                | -74,925      | 59           | 18                        |
| PFCIRM118_06465 | 250     | CyDye   | surface layer protein A (S-layer protein A)              | Cell wall                                       | <b>slpA</b>  | PSE                           | 58,500                | -102,331     | 53           | 20                        |
| PFCIRM118_06465 | 250     | ClGua   | surface layer protein A (S-layer protein A)              | Cell wall                                       | <b>slpA</b>  | PSE                           | 58,500                | -72,019      | 36           | 14                        |
| PFCIRM129_09350 | 250     | ClGua   | surface layer protein A (S-layer protein A)              | Cell wall                                       | <b>slpA</b>  | PSE                           | 58,300                | -32,692      | 20           | 6                         |
| PFCIRM134_08215 | 250     | ClGua   | surface layer protein A (S-layer protein A)              | Cell wall                                       | <b>slpA</b>  | PSE                           | 58,300                | -93,770      | 43           | 17                        |
| PFCIRM456_11555 | 250     | ClGua   | surface layer protein A (S-layer protein A)              | Cell wall                                       | <b>slpA</b>  | PSE                           | 58,400                | -37,411      | 18           | 8                         |
| PFCIRM118_06465 | 250     | Shaving | surface layer protein A (S-layer protein A)              | Cell wall                                       | <b>slpA</b>  | PSE                           | 58,500                | -399,131     | 84           | 80                        |
| PFCIRM129_09350 | 250     | Shaving | surface layer protein A (S-layer protein A)              | Cell wall                                       | <b>slpA</b>  | PSE                           | 58,300                | -24,241      | 13           | 5                         |
| PFCIRM134_08215 | 250     | Shaving | surface layer protein A (S-layer protein A)              | Cell wall                                       | <b>slpA</b>  | PSE                           | 58,300                | -61,794      | 21           | 11                        |
| PFCIRM138_05200 | 250     | Shaving | surface layer protein A (S-layer protein A)              | Cell wall                                       | <b>slpA</b>  | PSE                           | NA                    | -42,300      | NA           | 9                         |
| PFCIRM456_11555 | 250     | Shaving | surface layer protein A (S-layer protein A)              | Cell wall                                       | <b>slpA</b>  | PSE                           | 58,400                | -15,850      | 13           | 4                         |



| Locus Tag       | Cluster | Method  | Description                                                                          | Function                         | Gene name | SurfG+ Predicted Localization | Molecular Weight (Da) | log(E value) | Coverage (%) | Number Of Unique Peptides |
|-----------------|---------|---------|--------------------------------------------------------------------------------------|----------------------------------|-----------|-------------------------------|-----------------------|--------------|--------------|---------------------------|
| PFCIRM122_08190 | 252     | CyDye   | 60 kDa chaperonin 1 (Protein Cpn60 1)                                                | Protein folding                  | groL1     | CYTO                          | 56,100                | -106,379     | 50           | 25                        |
| PFCIRM134_05590 | 252     | CyDye   | (groEL protein 1) (Heat shock protein 60 1)<br>60 kDa chaperonin 1 (Protein Cpn60 1) | Protein folding                  | groL1     | CYTO                          | NA                    | -136,580     | NA           | 31                        |
| PFCIRM139_04180 | 252     | CyDye   | (groEL protein 1) (Heat shock protein 60 1)<br>60 kDa chaperonin 1 (Protein Cpn60 1) | Protein folding                  | groL1     | CYTO                          | NA                    | -10,336      | NA           | 3                         |
| PFCIRM1_05320   | 252     | CyDye   | (groEL protein 1) (Heat shock protein 60 1)<br>60 kDa chaperonin 1 (Protein Cpn60 1) | Protein folding                  | groL1     | CYTO                          | 56,000                | -46,939      | 23           | 8                         |
| PFCIRM138_11020 | 252     | CyDye   | (groEL protein 1) (Heat shock protein 60 1)<br>60 kDa chaperonin 1 (Protein Cpn60 1) | Protein folding                  | groL1     | CYTO                          | 56,000                | -91,900      | 39           | 16                        |
| PFCIRM527_05660 | 252     | CyDye   | (groEL protein 1) (Heat shock protein 60 1)<br>60 kDa chaperonin 1 (Protein Cpn60 1) | Protein folding                  | groL1     | CYTO                          | 56,000                | -109,250     | 52           | 23                        |
| PFCIRM118_06900 | 252     | Shaving | (groEL protein 1) (Heat shock protein 60 1)<br>60 kDa chaperonin 1 (Protein Cpn60 1) | Protein folding                  | groL1     | CYTO                          | 56,000                | -49,146      | 35           | 9                         |
| PFCIRM129_07835 | 252     | Shaving | (groEL protein 1) (Heat shock protein 60 1)<br>60 kDa chaperonin 1 (Protein Cpn60 1) | Protein folding                  | groL1     | CYTO                          | 56,000                | -10,320      | 12           | 3                         |
| PFCIRM134_05590 | 252     | Shaving | (groEL protein 1) (Heat shock protein 60 1)<br>60 kDa chaperonin 1 (Protein Cpn60 1) | Protein folding                  | groL1     | CYTO                          | 56,100                | -42,539      | 34           | 9                         |
| PFCIRM139_04180 | 252     | Shaving | (groEL protein 1) (Heat shock protein 60 1)<br>60 kDa chaperonin 1 (Protein Cpn60 1) | Protein folding                  | groL1     | CYTO                          | 56,000                | -21,067      | 20           | 5                         |
| PFCIRM516_06135 | 252     | Shaving | (groEL protein 1) (Heat shock protein 60 1)<br>60 kDa chaperonin 1 (Protein Cpn60 1) | Protein folding                  | groL1     | CYTO                          | 56,100                | -29,026      | 28           | 7                         |
| PFCIRM1_05320   | 252     | Shaving | (groEL protein 1) (Heat shock protein 60 1)                                          | Protein folding                  | groL1     | CYTO                          | 56,000                | -23,065      | 21           | 6                         |
| PFCIRM139_04175 | 253     | CyDye   | 10 kDa chaperonin 1 (Protein Cpn10 1)<br>(groES protein 1) (Heat shock 10 1)         | Protein folding                  | groS1     | CYTO                          | NA                    | -6,211       | NA           | 2                         |
| PFCIRM139_04175 | 253     | Shaving | 10 kDa chaperonin 1 (Protein Cpn10 1)<br>(groES protein 1) (Heat shock 10 1)         | Protein folding                  | groS1     | CYTO                          | 10,500                | -9,143       | 34           | 2                         |
| PFCIRM1_05325   | 253     | Shaving | (groES protein 1) (Heat shock 10 1)                                                  | Protein folding                  | groS1     | CYTO                          | 10,500                | -9,153       | 42           | 2                         |
| PFCIRM118_06880 | 256     | CyDye   | ATP-binding protein opuCA of<br>Glycine betaine/carnitine/choline ABC transporter    | Transport/binding of amino-acids | opuCA     | CYTO                          | 48,000                | -14,901      | 14           | 4                         |
| PFCIRM134_09550 | 264     | CyDye   | 50S ribosomal protein L7/L12                                                         | Ribosomal proteins               | rplL      | CYTO                          | 13,600                | -17,173      | 35           | 5                         |
| PFCIRM456_10160 | 264     | CyDye   | 50S ribosomal protein L7/L12                                                         | Ribosomal proteins               | rplL      | CYTO                          | 13,600                | -33,686      | 72           | 6                         |
| PFCIRM514_01645 | 264     | CyDye   | 50S ribosomal protein L7/L12                                                         | Ribosomal proteins               | rplL      | CYTO                          | 13,600                | -34,306      | 77           | 9                         |
| PFCIRM118_01845 | 264     | Shaving | 50S ribosomal protein L7/L12                                                         | Ribosomal proteins               | rplL      | CYTO                          | 15,700                | -10,037      | 19           | 2                         |
| PFCIRM118_01870 | 264     | Shaving | 50S ribosomal protein L7/L12                                                         | Ribosomal proteins               | rplL      | CYTO                          | 13,600                | -6,054       | 18           | 2                         |
| PFCIRM134_09550 | 264     | Shaving | 50S ribosomal protein L7/L12                                                         | Ribosomal proteins               | rplL      | CYTO                          | 13,600                | -16,327      | 58           | 4                         |
| PFCIRM139_03695 | 264     | Shaving | 50S ribosomal protein L7/L12                                                         | Ribosomal proteins               | rplL      | CYTO                          | 13,600                | -9,265       | 37           | 3                         |
| PFCIRM139_03720 | 264     | Shaving | 50S ribosomal protein L7/L12                                                         | Ribosomal proteins               | rplL      | CYTO                          | 17,400                | -11,936      | 24           | 3                         |
| PFCIRM1_05390   | 264     | Shaving | 50S ribosomal protein L7/L12                                                         | Ribosomal proteins               | rplL      | CYTO                          | 13,600                | -7,307       | 18           | 2                         |
| PFCIRM122_06715 | 269     | CyDye   | Elongation factor G (EF-G)                                                           | Translation elongation           | fusA      | CYTO                          | 76,500                | -37,847      | 22           | 10                        |
| PFCIRM129_08280 | 269     | CyDye   | Elongation factor G (EF-G)                                                           | Translation elongation           | fusA      | CYTO                          | 76,500                | -37,976      | 18           | 9                         |
| PFCIRM134_09520 | 269     | CyDye   | Elongation factor G (EF-G)                                                           | Translation elongation           | fusA      | CYTO                          | 76,500                | -43,604      | 21           | 11                        |

| Locus Tag       | Cluster | Method  | Description                                                         | Function                                   | Gene name | SurfG+ Predicted Localization | Molecular Weight (kDa) | log(E value) | Coverage (%) | Number Of Unique Peptides |
|-----------------|---------|---------|---------------------------------------------------------------------|--------------------------------------------|-----------|-------------------------------|------------------------|--------------|--------------|---------------------------|
| PFCIRM122_06710 | 270     | CyDye   | Elongation factor Tu                                                | Translation elongation                     | tuf       | CYTO                          | 43,600                 | -81,218      | 44           | 14                        |
| PFCIRM129_08275 | 270     | CyDye   | Elongation factor Tu                                                | Translation elongation                     | tuf       | CYTO                          | 43,600                 | -88,542      | 62           | 19                        |
| PFCIRM134_09515 | 270     | CyDye   | Elongation factor Tu                                                | Translation elongation                     | tuf       | CYTO                          | 43,500                 | -10,599      | 11           | 2                         |
| PFCIRM139_03730 | 270     | CyDye   | Elongation factor Tu                                                | Translation elongation                     | tuf       | CYTO                          | 43,600                 | -9,490       | 11           | 2                         |
| PFCIRM516_02330 | 270     | CyDye   | Elongation factor Tu                                                | Translation elongation                     | tuf       | CYTO                          | 43,500                 | -79,735      | 50           | 15                        |
| PFCIRM1_05425   | 270     | CyDye   | Elongation factor Tu                                                | Translation elongation                     | tuf       | CYTO                          | 43,600                 | -62,039      | 44           | 11                        |
| PFCIRM118_01835 | 270     | CyDye   | Elongation factor Tu                                                | Translation elongation                     | tuf       | CYTO                          | 43,600                 | -8,050       | 7            | 2                         |
| PFCIRM138_08795 | 270     | CyDye   | Elongation factor Tu                                                | Translation elongation                     | tuf       | CYTO                          | 43,600                 | -70,058      | 46           | 13                        |
| PFCIRM527_07270 | 270     | CyDye   | Elongation factor Tu                                                | Translation elongation                     | tuf       | CYTO                          | 43,600                 | -68,054      | 38           | 13                        |
| PFCIRM118_01835 | 270     | Shaving | Elongation factor Tu                                                | Translation elongation                     | tuf       | CYTO                          | 43,600                 | -47,602      | 27           | 9                         |
| PFCIRM121_11145 | 270     | Shaving | Elongation factor Tu                                                | Translation elongation                     | tuf       | CYTO                          | 43,600                 | -11,573      | 12           | 3                         |
| PFCIRM129_08275 | 270     | Shaving | Elongation factor Tu                                                | Translation elongation                     | tuf       | CYTO                          | 43,600                 | -14,001      | 12           | 3                         |
| PFCIRM134_09515 | 270     | Shaving | Elongation factor Tu                                                | Translation elongation                     | tuf       | CYTO                          | 43,500                 | -38,859      | 24           | 8                         |
| PFCIRM139_03730 | 270     | Shaving | Elongation factor Tu                                                | Translation elongation                     | tuf       | CYTO                          | 43,600                 | -19,254      | 20           | 4                         |
| PFCIRM456_10195 | 270     | Shaving | Elongation factor Tu                                                | Translation elongation                     | tuf       | CYTO                          | 43,600                 | -28,877      | 24           | 6                         |
| PFCIRM516_02330 | 270     | Shaving | Elongation factor Tu                                                | Translation elongation                     | tuf       | CYTO                          | 43,500                 | -41,332      | 29           | 8                         |
| PFCIRM516_11390 | 315     | CyDye   | dolichyl-phosphate beta-D-mannosyltransferase                       | Cell wall                                  | dpm       | CYTO                          | 31,600                 | -15,678      | 16           | 4                         |
| PFCIRM1_05675   | 315     | CyDye   | dolichyl-phosphate beta-D-mannosyltransferase                       | Cell wall                                  | dpm       | CYTO                          | 31,600                 | -44,022      | 38           | 9                         |
| PFCIRM118_00230 | 315     | CyDye   | dolichyl-phosphate beta-D-mannosyltransferase                       | Cell wall                                  | dpm       | CYTO                          | 32,000                 | -35,647      | 35           | 8                         |
| PFCIRM138_03565 | 315     | CyDye   | dolichyl-phosphate beta-D-mannosyltransferase                       | Cell wall                                  | dpm       | CYTO                          | 32,000                 | -25,936      | 28           | 7                         |
| PFCIRM527_01975 | 315     | CyDye   | dolichyl-phosphate beta-D-mannosyltransferase                       | Cell wall                                  | dpm       | CYTO                          | 32,000                 | -23,717      | 25           | 7                         |
| PFCIRM1_05685   | 318     | Shaving | Hypothetical protein                                                | Pouf, without similarity to other proteins | 0         | CYTO                          | 57,300                 | -4,333       | 11           | 2                         |
| PFCIRM516_02670 | 355     | CyDye   | Transaldolase 1                                                     | Main glycolytic pathways                   | tal1      | CYTO                          | 37,900                 | -5,222       | 7            | 2                         |
| PFCIRM456_09960 | 376     | CyDye   | NADH-quinone oxidoreductase chain C (NADH dehydrogenase I, chain C) | Membrane bioenergetics                     | nuoC      | CYTO                          | 50,200                 | -44,253      | 31           | 10                        |
| PFCIRM118_09360 | 376     | CyDye   | NADH-quinone oxidoreductase chain D (NADH dehydrogenase I, chain D) | Membrane bioenergetics                     | nuoD      | CYTO                          | 50,200                 | -15,724      | 10           | 4                         |
| PFCIRM134_09635 | 398     | Shaving | Peroxiredoxin/Alkyl hydroperoxide reductase subunit C               | Detoxification                             | ahpC      | CYTO                          | 20,900                 | -15,260      | 21           | 2                         |
| PFCIRM139_03610 | 398     | Shaving | Thioredoxin peroxidase                                              | Detoxification                             | ahpC      | CYTO                          | 20,900                 | -16,711      | 30           | 3                         |

| Locus Tag       | Cluster | Method  | Description                                               | Function                                              | Gene name | SurfG+ Predicted Localization | Molecular Weight (Da) | log(E value) | Coverage (%) | Number Of Unique Peptides |
|-----------------|---------|---------|-----------------------------------------------------------|-------------------------------------------------------|-----------|-------------------------------|-----------------------|--------------|--------------|---------------------------|
| PFCIRM1_06355   | 442     | Shaving | Protein-export membrane protein secD                      | Protein secretion                                     | secD      | PSE                           | 59,800                | -11,387      | 4            | 3                         |
| PFCIRM118_05035 | 459     | Shaving | Enolase 1                                                 | Main glycolytic pathways                              | eno1      | CYTO                          | 45,800                | -29,433      | 16           | 4                         |
| PFCIRM139_01570 | 459     | Shaving | Enolase 1                                                 | Main glycolytic pathways                              | eno1      | CYTO                          | 45,900                | -26,376      | 19           | 5                         |
| PFCIRM516_05380 | 459     | Shaving | Enolase 1                                                 | Main glycolytic pathways                              | eno1      | CYTO                          | 45,800                | -28,571      | 21           | 5                         |
| PFCIRM1_06660   | 459     | Shaving | Enolase 1                                                 | Main glycolytic pathways                              | eno1      | CYTO                          | 45,800                | -8,185       | 9            | 2                         |
| PFCIRM516_05390 | 461     | Shaving | Hypothetical protein                                      | Pouf similar to other proteins from the same organism | 0         | SECRETED                      | 18,200                | -21,477      | 42           | 5                         |
| PFCIRM1_06920   | 508     | Shaving | Trypsin-like serine protease                              | Transport/binding of proteins/peptides                | htrA1     | CYTO                          | 28,600                | -13,577      | 9            | 2                         |
| PFCIRM121_06725 | 519     | Shaving | secreted transglycosydase                                 | Cell wall                                             | 0         | PSE                           | 19,900                | -15,363      | 38           | 2                         |
| PFCIRM122_07625 | 519     | Shaving | secreted transglycosydase                                 | Cell wall                                             | 0         | PSE                           | 19,900                | -28,663      | 47           | 5                         |
| PFCIRM129_11920 | 519     | Shaving | secreted transglycosydase                                 | Cell wall                                             | 0         | PSE                           | 20,000                | -52,589      | 43           | 6                         |
| PFCIRM139_07535 | 519     | Shaving | secreted transglycosydase                                 | Cell wall                                             | 0         | PSE                           | 20,000                | -38,304      | 49           | 5                         |
| PFCIRM456_03610 | 519     | Shaving | secreted transglycosydase                                 | Cell wall                                             | 0         | PSE                           | 19,900                | -37,560      | 58           | 5                         |
| PFCIRM516_09370 | 519     | Shaving | secreted transglycosydase                                 | Cell wall                                             | 0         | PSE                           | 20,400                | -19,186      | 47           | 4                         |
| PFCIRM527_08570 | 519     | Shaving | secreted transglycosydase                                 | Cell wall                                             | 0         | PSE                           | NA                    | -8,000       | NA           | 3                         |
| PFCIRM1_06990   | 519     | Shaving | secreted transglycosydase                                 | Cell wall                                             | 0         | PSE                           | 20,000                | -49,295      | 55           | 6                         |
| PFCIRM118_10130 | 521     | CyDye   | Hypothetical protein                                      | Pouf similar to proteins from other organisms         | 0         | CYTO                          | 27,700                | -20,573      | 23           | 4                         |
| PFCIRM138_00535 | 521     | CyDye   | Hypothetical protein                                      | Pouf similar to proteins from other organisms         | 0         | CYTO                          | 27,800                | -15,895      | 23           | 4                         |
| PFCIRM121_06705 | 523     | Shaving | Peptidase Subtilases                                      | Metabolism of amino acids and related molecules       | vpr       | PSE                           | 54,700                | -17,420      | 14           | 4                         |
| PFCIRM122_07605 | 523     | Shaving | Peptidase Subtilases                                      | Metabolism of amino acids and related molecules       | vpr       | PSE                           | 54,600                | -18,241      | 12           | 4                         |
| PFCIRM134_08800 | 523     | Shaving | Peptidase Subtilases                                      | Metabolism of amino acids and related molecules       | vpr       | PSE                           | 54,700                | -7,298       | 5            | 2                         |
| PFCIRM139_07515 | 523     | Shaving | Peptidase Subtilases                                      | Metabolism of amino acids and related molecules       | vpr       | PSE                           | 54,600                | -20,926      | 14           | 4                         |
| PFCIRM456_03630 | 523     | Shaving | Peptidase Subtilases                                      | Metabolism of amino acids and related molecules       | vpr       | PSE                           | 51,100                | -14,727      | 10           | 3                         |
| PFCIRM514_08785 | 523     | Shaving | Peptidase Subtilases                                      | Metabolism of amino acids and related molecules       | vpr       | PSE                           | 54,700                | -16,170      | 9            | 3                         |
| PFCIRM516_09350 | 523     | Shaving | Peptidase Subtilases                                      | Metabolism of amino acids and related molecules       | vpr       | PSE                           | 54,700                | -19,811      | 12           | 4                         |
| PFCIRM527_08590 | 523     | Shaving | Peptidase Subtilases                                      | Metabolism of amino acids and related molecules       | vpr       | PSE                           | 51,100                | -16,825      | 10           | 3                         |
| PFCIRM1_07010   | 523     | Shaving | Peptidase Subtilases                                      | Metabolism of amino acids and related molecules       | vpr       | PSE                           | 51,100                | -22,839      | 14           | 5                         |
| PFCIRM139_08815 | 536     | Shaving | Succinate dehydrogenase                                   | Membrane bioenergetics                                | sdhB3     | CYTO                          | 27,000                | -15,584      | 10           | 2                         |
| PFCIRM139_08820 | 537     | Shaving | Succinate dehydrogenase flavoprotein subunit              | Membrane bioenergetics                                | sdhA3     | CYTO                          | 74,700                | -12,754      | 4            | 2                         |
| PFCIRM139_08850 | 543     | Shaving | 16S rRNA processing protein Glucose-6-phosphate isomerase | Ribosomal proteins                                    | rimM      | CYTO                          | 17,700                | -12,402      | 28           | 3                         |
| PFCIRM129_10650 | 637     | Shaving | (Phosphohexose isomerase)                                 | Main glycolytic pathways                              | pgi       | CYTO                          | 33,700                | -10,656      | 13           | 2                         |
| PFCIRM514_09685 | 637     | Shaving | Glucose-6-phosphate isomerase (Phosphohexose isomerase)   | Main glycolytic pathways                              | pgi       | CYTO                          | 33,700                | -6,177       | 11           | 2                         |
| PFCIRM1_10215   | 637     | Shaving | Glucose-6-phosphate isomerase (Phosphohexose isomerase)   | Main glycolytic pathways                              | pgi       | CYTO                          | 33,600                | -12,818      | 13           | 2                         |

| Locus Tag       | Cluster | Method  | Description                                         | Function                                             | Gene name   | SurfG+ Predicted Localization | Molecular Weight (Da) | log(E value) | Coverage (%) | Number Of Unique Peptides |
|-----------------|---------|---------|-----------------------------------------------------|------------------------------------------------------|-------------|-------------------------------|-----------------------|--------------|--------------|---------------------------|
| PFCIRM139_08315 | 656     | CyDye   | 2,5-diketo-D-gluconate reductase A                  | Metabolism of coenzymes and prosthetic groups        | <b>dkgA</b> | CYTO                          | 30,400                | -13,669      | 20           | 4                         |
| PFCIRM121_10700 | 672     | Shaving | peptidyl-prolyl cis-trans isomerase                 | Protein folding                                      |             | SECRETED                      | 35,800                | -12,082      | 17           | 3                         |
| PFCIRM122_06285 | 672     | Shaving | peptidyl-prolyl cis-trans isomerase                 | Protein folding                                      |             | SECRETED                      | 35,800                | -10,835      | 20           | 4                         |
| PFCIRM129_09980 | 672     | Shaving | peptidyl-prolyl cis-trans isomerase                 | Protein folding                                      |             | SECRETED                      | 35,900                | -9,084       | 10           | 3                         |
| PFCIRM138_04965 | 672     | Shaving | peptidyl-prolyl cis-trans isomerase                 | Protein folding                                      |             | SECRETED                      | 35,800                | -6,878       | 5            | 2                         |
| PFCIRM139_00840 | 672     | Shaving | peptidyl-prolyl cis-trans isomerase                 | Protein folding                                      |             | SECRETED                      | 35,900                | -9,308       | 10           | 3                         |
| PFCIRM456_01975 | 672     | Shaving | peptidyl-prolyl cis-trans isomerase                 | Protein folding                                      |             | SECRETED                      | 35,900                | -11,379      | 13           | 3                         |
| PFCIRM514_02235 | 672     | Shaving | peptidyl-prolyl cis-trans isomerase                 | Protein folding                                      |             | SECRETED                      | 35,900                | -10,573      | 10           | 3                         |
| PFCIRM1_11270   | 672     | Shaving | peptidyl-prolyl cis-trans isomerase                 | Protein folding                                      |             | SECRETED                      | 35,900                | -9,482       | 15           | 3                         |
| PFCIRM118_07930 | 681     | Shaving | CTP synthase (UTP--ammonia ligase) (CTP synthetase) | Metabolism of nucleotides and nucleic acids          | <b>pyrG</b> | CYTO                          | 63,700                | -9,837       | 4            | 2                         |
| PFCIRM122_12040 | 701     | CyDye   | Elongation factor Ts (EF-Ts)                        | Translation elongation                               | <b>tsf</b>  | CYTO                          | 28,800                | -16,979      | 9            | 3                         |
| PFCIRM129_11075 | 701     | CyDye   | Elongation factor Ts (EF-Ts)                        | Translation elongation                               | <b>tsf</b>  | CYTO                          | 28,800                | -20,484      | 26           | 5                         |
| PFCIRM139_12390 | 701     | CyDye   | Elongation factor Ts (EF-Ts)                        | Translation elongation                               | <b>tsf</b>  | CYTO                          | 28,800                | -28,109      | 26           | 7                         |
| PFCIRM456_08500 | 701     | CyDye   | Elongation factor Ts (EF-Ts)                        | Translation elongation                               | <b>tsf</b>  | CYTO                          | 28,800                | -12,118      | 16           | 3                         |
| PFCIRM516_00855 | 701     | CyDye   | Elongation factor Ts (EF-Ts)                        | Translation elongation                               | <b>tsf</b>  | CYTO                          | 28,800                | -37,116      | 40           | 8                         |
| PFCIRM1_11415   | 701     | CyDye   | Elongation factor Ts (EF-Ts)                        | Translation elongation                               | <b>tsf</b>  | CYTO                          | 28,800                | -31,240      | 28           | 6                         |
| PFCIRM138_01405 | 701     | CyDye   | Elongation factor Ts (EF-Ts)                        | Translation elongation                               | <b>tsf</b>  | CYTO                          | 28,800                | -31,200      | 20           | 5                         |
| PFCIRM527_01005 | 701     | CyDye   | Elongation factor Ts (EF-Ts)                        | Translation elongation                               | <b>tsf</b>  | CYTO                          | 28,800                | -24,141      | 20           | 5                         |
| PFCIRM139_04860 | 710     | Shaving | Hypothetical protein                                | Pouf similar to proteins from other organisms        |             | PSE                           | 10,700                | -9,985       | 32           | 2                         |
| PFCIRM122_07445 | 728     | CyDye   | Pyruvate phosphate dikinase                         | Metabolism of carbohydrates<br>And related molecules | <b>ppdk</b> | CYTO                          | 95,700                | -85,038      | 30           | 19                        |
| PFCIRM129_01500 | 728     | CyDye   | Pyruvate phosphate dikinase                         | Metabolism of carbohydrates<br>And related molecules | <b>ppdk</b> | CYTO                          | 95,700                | -95,012      | 24           | 17                        |
| PFCIRM134_06645 | 728     | CyDye   | Pyruvate phosphate dikinase                         | Metabolism of carbohydrates<br>And related molecules | <b>ppdk</b> | CYTO                          | 95,700                | -127,458     | 39           | 29                        |
| PFCIRM516_12725 | 728     | CyDye   | Pyruvate phosphate dikinase                         | Metabolism of carbohydrates<br>And related molecules | <b>ppdk</b> | CYTO                          | 95,700                | -134,636     | 47           | 32                        |
| PFCIRM1_01390   | 728     | CyDye   | Pyruvate phosphate dikinase                         | Metabolism of carbohydrates<br>And related molecules | <b>ppdk</b> | CYTO                          | 95,700                | -35,622      | 15           | 8                         |
| PFCIRM527_12240 | 728     | CyDye   | Pyruvate phosphate dikinase                         | Metabolism of carbohydrates<br>And related molecules | <b>ppdk</b> | CYTO                          | 95,700                | -211,512     | 51           | 36                        |
| PFCIRM118_09205 | 728     | Shaving | Pyruvate phosphate dikinase                         | Metabolism of carbohydrates<br>And related molecules | <b>ppdk</b> | CYTO                          | 95,700                | -12,776      | 7            | 4                         |

| Locus Tag       | Cluster | Method  | Description                                                                                | Function                                          | Gene name          | SurfG+ Predicted Localization | Molecular Weight (Da) | log(E value) | Coverage (%) | Number Of Unique Peptides |
|-----------------|---------|---------|--------------------------------------------------------------------------------------------|---------------------------------------------------|--------------------|-------------------------------|-----------------------|--------------|--------------|---------------------------|
| PFCIRM527_10710 | 753     | CyDye   | FAD linked oxidase domain protein                                                          | Membrane bioenergetics                            |                    | CYTO                          | 100,400               | -58,541      | 17           | 13                        |
| PFCIRM118_05605 | 754     | CyDye   | Acyl-CoA dehydrogenase                                                                     | Metabolism of lipids                              | <b>fad</b>         | CYTO                          | 40,800                | -7,240       | 7            | 2                         |
| PFCIRM134_09020 | 785     | CyDye   | Chaperone protein dnaK 1 (Heat shock protein 70 1)                                         | Protein folding                                   | <b>dnaK1</b>       | CYTO                          | 65,300                | -105,209     | 36           | 26                        |
| PFCIRM1_06910   | 785     | CyDye   | Chaperone protein dnaK 1 (Heat shock protein 70 1)                                         | Protein folding                                   | <b>dnaK1</b>       | CYTO                          | 65,300                | -40,528      | 18           | 7                         |
| PFCIRM134_09020 | 785     | ClGua   | Chaperone protein dnaK 1 (Heat shock protein 70 1)                                         | Protein folding                                   | <b>dnaK1</b>       | CYTO                          | 65,300                | -11,205      | 9            | 4                         |
| PFCIRM118_05275 | 785     | Shaving | Chaperone protein dnaK 1 (Heat shock protein 70 1)                                         | Protein folding                                   | <b>dnaK1</b>       | CYTO                          | 65,300                | -11,196      | 5            | 2                         |
| PFCIRM139_01305 | 785     | Shaving | Chaperone protein dnaK 1 (Heat shock protein 70 1)                                         | Protein folding                                   | <b>dnaK1</b>       | CYTO                          | 65,300                | -10,024      | 8            | 3                         |
| PFCIRM456_09350 | 810     | Shaving | Hypothetical protein binding protein of phosphate ABC transporter (BP:MOI:undef:phosphate) | Pouf, without similarity to other proteins        |                    | PSE                           | 23,700                | -8,369       | 23           | 3                         |
| PFCIRM516_10105 | 860     | Shaving | Hypothetical protein                                                                       | Transport/binding of inorganic ions               | <b>pstS</b>        | PSE                           | 36,400                | -11,210      | 10           | 2                         |
| PFCIRM134_00955 | 875     | CyDye   | Aspartate-semialdehyde dehydrogenase (Semialdehyde dehydrogenase)                          | Metabolism of carbohydrates And related molecules | <b>asd</b>         | CYTO                          | 36,400                | -29,176      | 28           | 7                         |
| PFCIRM1_07715   | 875     | CyDye   | Aspartate-semialdehyde dehydrogenase (Semialdehyde dehydrogenase)                          | Metabolism of carbohydrates And related molecules | <b>asd</b>         | CYTO                          | 36,500                | -14,189      | 21           | 4                         |
| PFCIRM118_03210 | 875     | CyDye   | Aspartate-semialdehyde dehydrogenase (Semialdehyde dehydrogenase)                          | Metabolism of carbohydrates And related molecules | <b>asd</b>         | CYTO                          | 36,400                | -50,233      | 36           | 9                         |
| PFCIRM138_08080 | 875     | CyDye   | Aspartate-semialdehyde dehydrogenase (Semialdehyde dehydrogenase)                          | Metabolism of carbohydrates And related molecules | <b>asd</b>         | CYTO                          | 36,400                | -55,557      | 36           | 9                         |
| PFCIRM527_04750 | 875     | CyDye   | Aspartate-semialdehyde dehydrogenase (Semialdehyde dehydrogenase)                          | Metabolism of carbohydrates And related molecules | <b>asd</b>         | CYTO                          | 36,400                | -52,201      | 39           | 9                         |
| PFCIRM134_01025 | 889     | CyDye   | chaperone clpC (ATP-dependent Clp protease ATP-binding subunit)                            | Protein folding                                   | <b>clpC</b>        | CYTO                          | NA                    | -58,238      | NA           | 15                        |
| PFCIRM1_07785   | 889     | CyDye   | chaperone clpC (ATP-dependent Clp protease ATP-binding subunit)                            | Protein folding                                   | <b>clpC</b>        | CYTO                          | 94,200                | -136,850     | 36           | 25                        |
| PFCIRM118_03140 | 889     | CyDye   | chaperone clpC (ATP-dependent Clp protease ATP-binding subunit)                            | Protein folding                                   | <b>clpC</b>        | CYTO                          | 94,200                | -80,423      | 27           | 16                        |
| PFCIRM1_07785   | 889     | Shaving | chaperone clpC (ATP-dependent Clp protease ATP-binding subunit)                            | Protein folding                                   | <b>clpC</b>        | CYTO                          | 94,200                | -8,357       | 3            | 2                         |
| PFCIRM122_12425 | 917     | CyDye   | Phenylalanyl-tRNA synthetase beta chain (Phenylalanine-- tRNA ligase beta chain)           | Aminoacyl-tRNA synthetases                        | <b>pheT</b>        | CYTO                          | 89,900                | -14,401      | 7            | 4                         |
| PFCIRM514_07125 | 945     | CyDye   | Hypothetical protein                                                                       | Pouf, without similarity to other proteins        |                    | MEMBRANE                      | 36,800                | -5,678       | 8            | 2                         |
| PFCIRM516_04180 | 945     | CyDye   | Hypothetical protein                                                                       | Pouf, without similarity to other proteins        |                    | MEMBRANE                      | 36,800                | -14,403      | 21           | 5                         |
| PFCIRM122_01005 | 951     | CyDye   | Methylmalonic acid semialdehyde dehydrogenase                                              | Specific carbohydrate metabolic pathway           | <b>iolA (msdA)</b> | CYTO                          | 52,700                | -31,902      | 16           | 5                         |
| PFCIRM118_10555 | 951     | Shaving | Methylmalonic acid semialdehyde dehydrogenase                                              | Specific carbohydrate metabolic pathway           | <b>iolA (msdA)</b> | CYTO                          | 52,700                | -13,970      | 6            | 2                         |
| PFCIRM516_04260 | 961     | CyDye   | Lysine exporter protein, membran protein                                                   | Transport/binding of amino-acids                  | <b>lysE</b>        | MEMBRANE                      | 63,200                | -22,900      | 19           | 8                         |
| PFCIRM1_09590   | 961     | CyDye   | Lysine exporter protein, membran protein                                                   | Transport/binding of amino-acids                  | <b>ilvD</b>        | CYTO                          | 64,900                | -67,434      | 25           | 11                        |
| PFCIRM118_10500 | 961     | CyDye   | Methylmalonyl-CoA carboxytransferase 5S subunit. (transcarboxylase 5S) 505 bp              | Metabolism of carbohydrates And related molecules | <b>ilvD</b>        | CYTO                          | 64,900                | -39,924      | 18           | 8                         |
| PFCIRM118_10440 | 974     | Shaving | Methylmalonyl-CoA carboxytransferase 12S subunit (Transcarboxylase 12S subunit)            | Specific carbohydrate metabolic pathway           |                    | CYTO                          | 55,500                | -16,351      | 6            | 2                         |
| PFCIRM516_04330 | 975     | CyDye   | Methylmalonyl-CoA carboxytransferase 12S subunit (Transcarboxylase 12S subunit)            | Specific carbohydrate metabolic pathway           | <b>mmdA</b>        | CYTO                          | 56,300                | -79,818      | 42           | 18                        |
| PFCIRM118_10430 | 975     | Shaving | Methylmalonyl-CoA carboxytransferase ( Transcarboxylase 12S subunit)                       | Specific carbohydrate metabolic pathway           | <b>mmdA</b>        | CYTO                          | 56,300                | -13,818      | 5            | 2                         |
| PFCIRM118_10420 | 977     | Shaving | Methylmalonyl-CoA carboxytransferase (Transcarboxylase, 1.3S subunit)                      | Specific carbohydrate metabolic pathway           | <b>bccp</b>        | CYTO                          | 12,300                | -23,612      | 39           | 3                         |
| PFCIRM527_09640 | 980     | CyDye   | phosphoglycerate mutase                                                                    | Main glycolytic pathways                          | <b>gpm2</b>        | CYTO                          | 27,800                | -19,369      | 30           | 5                         |

| Locus Tag       | Cluster | Method  | Description                                                                   | Function                                             | Gene name      | SurfG+ Predicted Localization | Molecular Weight (Da) | log(E value) | Coverage (%) | Number Of Unique Peptides |
|-----------------|---------|---------|-------------------------------------------------------------------------------|------------------------------------------------------|----------------|-------------------------------|-----------------------|--------------|--------------|---------------------------|
| PFCIRM122_06000 | 1043    | CyDye   | Heat shock protein 20 2 (20 kDa chaperone 2)                                  | Protein folding                                      | <b>hsp20 2</b> | CYTO                          | 16,800                | -29,445      | 64           | 7                         |
| PFCIRM129_03120 | 1043    | CyDye   | Heat shock protein 20 2 (20 kDa chaperone 2)                                  | Protein folding                                      | <b>hsp20 2</b> | CYTO                          | 16,800                | -24,827      | 51           | 6                         |
| PFCIRM134_10890 | 1043    | CyDye   | Heat shock protein 20 2 (20 kDa chaperone 2)                                  | Protein folding                                      | <b>hsp20 2</b> | CYTO                          | 16,800                | -23,715      | 44           | 5                         |
| PFCIRM139_07050 | 1043    | CyDye   | Heat shock protein 20 2 (20 kDa chaperone 2)                                  | Protein folding                                      | <b>hsp20 2</b> | CYTO                          | 16,800                | -25,979      | 53           | 5                         |
| PFCIRM456_00640 | 1043    | CyDye   | Heat shock protein 20 2 (20 kDa chaperone 2)                                  | Protein folding                                      | <b>hsp20 2</b> | CYTO                          | 16,800                | -34,842      | 64           | 8                         |
| PFCIRM516_08345 | 1043    | CyDye   | Heat shock protein 20 2 (20 kDa chaperone 2)                                  | Protein folding                                      | <b>hsp20 2</b> | CYTO                          | 16,800                | -30,305      | 59           | 6                         |
| PFCIRM1_10645   | 1043    | CyDye   | Heat shock protein 20 2 (20 kDa chaperone 2)                                  | Protein folding                                      | <b>hsp20 2</b> | CYTO                          | 16,800                | -39,412      | 58           | 6                         |
| PFCIRM118_09610 | 1043    | CyDye   | Heat shock protein 20 2 (20 kDa chaperone 2)                                  | Protein folding                                      | <b>hsp20 2</b> | CYTO                          | 16,800                | -23,223      | 38           | 4                         |
| PFCIRM138_10010 | 1043    | CyDye   | Heat shock protein 20 2 (20 kDa chaperone 2)                                  | Protein folding                                      | <b>hsp20 2</b> | CYTO                          | 16,800                | -36,855      | 59           | 6                         |
| PFCIRM527_10125 | 1043    | CyDye   | Heat shock protein 20 2 (20 kDa chaperone 2)                                  | Protein folding                                      | <b>hsp20 2</b> | CYTO                          | 16,800                | -35,753      | 53           | 5                         |
| PFCIRM118_09610 | 1043    | Shaving | Heat shock protein 20 2 (20 kDa chaperone 2)                                  | Protein folding                                      | <b>hsp20 2</b> | CYTO                          | 16,800                | -23,203      | 31           | 3                         |
| PFCIRM516_08345 | 1043    | Shaving | Heat shock protein 20 2 (20 kDa chaperone 2)                                  | Protein folding                                      | <b>hsp20 2</b> | CYTO                          | 16,800                | -23,975      | 40           | 3                         |
| PFCIRM1_10645   | 1043    | Shaving | Heat shock protein 20 2 (20 kDa chaperone 2)                                  | Protein folding                                      | <b>hsp20 2</b> | CYTO                          | 16,800                | -17,702      | 25           | 2                         |
| PFCIRM122_05975 | 1047    | CyDye   | 4-aminobutyrate aminotransferase                                              | Metabolism of carbohydrates<br>And related molecules | <b>gabT</b>    | CYTO                          | 46,600                | -44,590      | 25           | 11                        |
| PFCIRM456_00680 | 1050    | CyDye   | Peptide chain release factor 2 (RF-2)                                         | Nonribosomal protein synthesis                       | <b>prfB</b>    | CYTO                          | 41,000                | -26,360      | 25           | 5                         |
| PFCIRM1_10700   | 1053    | Shaving | Hypothetical protein                                                          | Pouf, without similarity to other proteins           |                | CYTO                          | 48,000                | -8,173       | 6            | 2                         |
| PFCIRM1_10740   | 1061    | CyDye   | Preprotein translocase SecA subunit                                           | Transport/binding proteins and lipoproteins          |                | CYTO                          | 106,300               | -61,144      | 22           | 15                        |
| PFCIRM138_10105 | 1061    | CyDye   | Preprotein translocase SecA subunit                                           | Transport/binding proteins and lipoproteins          |                | CYTO                          | 106,300               | -62,053      | 21           | 13                        |
| PFCIRM139_06890 | 1072    | Shaving | Cold shock-like protein CspA                                                  | Adaptation to atypical conditions                    | <b>cspA</b>    | CYTO                          | 7,300                 | -10,012      | 24           | 2                         |
| PFCIRM456_04270 | 1094    | CyDye   | binding protein of oligopeptide ABC transporter<br>ATP synthase subunit alpha | Transport/binding of amino-acids                     |                | PSE                           | 54,900                | -9,945       | 9            | 3                         |
| PFCIRM134_11390 | 1134    | CyDye   | (ATP synthase F1 sector subunit alpha)<br>ATP synthase subunit alpha          | Membrane bioenergetics                               | <b>atpA</b>    | CYTO                          | 58,800                | -51,207      | 28           | 13                        |
| PFCIRM138_10500 | 1134    | CyDye   | (ATP synthase F1 sector subunit alpha)<br>ATP synthase subunit beta           | Membrane bioenergetics                               | <b>atpA</b>    | CYTO                          | 58,900                | -36,040      | 25           | 10                        |
| PFCIRM456_04495 | 1136    | CyDye   | (ATP synthase F1 sector subunit beta)<br>ATP synthase subunit beta            | Membrane bioenergetics                               | <b>atpD</b>    | CYTO                          | 52,400                | -92,352      | 64           | 21                        |
| PFCIRM527_08960 | 1136    | CyDye   | (ATP synthase F1 sector subunit beta)                                         | Membrane bioenergetics                               | <b>atpD</b>    | CYTO                          | 50,400                | -97,438      | 63           | 21                        |
| PFCIRM134_11440 | 1144    | CyDye   | Hypothetical protein                                                          | Pouf similar to proteins from other organisms        |                | CYTO                          | 63,900                | -4,208       | 3            | 2                         |
| PFCIRM516_09000 | 1144    | CyDye   | Hypothetical protein                                                          | Pouf similar to proteins from other organisms        |                | CYTO                          | 63,900                | -18,313      | 14           | 6                         |
| PFCIRM129_05085 | 1148    | CyDye   | Phosphoglucomutase                                                            | Specific carbohydrate metabolic pathway              | <b>pgm1</b>    | CYTO                          | 58,600                | -5,819       | 5            | 2                         |
| PFCIRM118_02025 | 1148    | CyDye   | Phosphoglucomutase                                                            | Specific carbohydrate metabolic pathway              | <b>pgm1</b>    | CYTO                          | 58,600                | -5,422       | 4            | 2                         |
| PFCIRM118_11145 | 1168    | Shaving | serine protease, trypsin-like serine proteases                                | Transport/binding of proteins/peptides               | <b>htrA2</b>   | PSE                           | 47,700                | -13,666      | 7            | 2                         |
| PFCIRM121_07190 | 1168    | Shaving | serine protease, trypsin-like serine proteases                                | Transport/binding of proteins/peptides               | <b>htrA2</b>   | PSE                           | 47,700                | -17,283      | 10           | 3                         |
| PFCIRM122_09940 | 1168    | Shaving | serine protease, trypsin-like serine proteases                                | Transport/binding of proteins/peptides               | <b>htrA2</b>   | PSE                           | 47,700                | -9,945       | 7            | 2                         |
| PFCIRM516_11155 | 1168    | Shaving | serine protease, trypsin-like serine proteases                                | Transport/binding of proteins/peptides               | <b>htrA2</b>   | PSE                           | 47,800                | -13,217      | 10           | 3                         |
| PFCIRM1_00060   | 1168    | Shaving | serine protease, trypsin-like serine proteases                                | Transport/binding of proteins/peptides               | <b>htrA2</b>   | PSE                           | 47,700                | -9,549       | 12           | 3                         |
| PFCIRM1_00345   | 1184    | Shaving | Ferrous iron uptake protein B 9.A.8.1.x                                       | Transport/binding of inorganic ions                  | <b>feoB</b>    | MEMBRANE                      | 66,300                | -12,000      | 5            | 2                         |
| PFCIRM134_12030 | 1204    | CyDye   | Galactose-1-phosphate uridylyltransferase                                     | Specific carbohydrate metabolic pathway              | <b>galT</b>    | CYTO                          | 75,100                | -5,207       | 3            | 2                         |
| PFCIRM134_12110 | 1223    | ClGua   | Trigger factor (TF)                                                           | Protein folding                                      | <b>tig</b>     | CYTO                          | 57,300                | -5,740       | 5            | 2                         |
| PFCIRM118_11995 | 1223    | Shaving | Trigger factor (TF)                                                           | Protein folding                                      | <b>tig</b>     | CYTO                          | 57,300                | -14,049      | 7            | 2                         |
| PFCIRM129_09060 | 1238    | Shaving | Hypothetical protein                                                          | Pouf, without similarity to other proteins           |                | CYTO                          | 26,100                | -9,913       | 13           | 2                         |

| Locus Tag       | Cluster | Method  | Description                                                            | Function                                              | Gene name | SurfG+ Predicted Localization | Molecular Weight (Da) | log(E value) | Coverage (%) | Number Of Unique Peptides |
|-----------------|---------|---------|------------------------------------------------------------------------|-------------------------------------------------------|-----------|-------------------------------|-----------------------|--------------|--------------|---------------------------|
| PFCIRM121_03270 | 1239    | Shaving | Hypothetical secreted protein                                          | Pouf similar to other proteins from the same organism |           | PSE                           | 26,200                | -9,278       | 22           | 3                         |
| PFCIRM122_02285 | 1239    | Shaving | Hypothetical secreted protein                                          | Pouf similar to other proteins from the same organism |           | PSE                           | 26,200                | -16,358      | 26           | 4                         |
| PFCIRM134_06455 | 1239    | Shaving | Hypothetical secreted protein                                          | Pouf similar to other proteins from the same organism |           | PSE                           | 26,100                | -6,316       | 13           | 2                         |
| PFCIRM456_06035 | 1239    | Shaving | Hypothetical secreted protein                                          | Pouf similar to other proteins from the same organism |           | PSE                           | 26,200                | -11,996      | 30           | 5                         |
| PFCIRM516_12900 | 1239    | Shaving | Hypothetical secreted protein                                          | Pouf similar to other proteins from the same organism |           | PSE                           | 26,200                | -9,346       | 13           | 2                         |
| PFCIRM1_01335   | 1239    | Shaving | Hypothetical secreted protein                                          | Pouf similar to other proteins from the same organism |           | PSE                           | 26,200                | -9,305       | 17           | 2                         |
| PFCIRM139_08410 | 1258    | Shaving | 50S ribosomal protein L9                                               | Ribosomal proteins                                    | rplI      | CYTO                          | 16,000                | -9,711       | 25           | 2                         |
| PFCIRM122_06630 | 1266    | Shaving | polar amino acid ABC transporter, Binding protein component            | Transport/binding of amino-acids                      |           | PSE                           | 30,000                | -17,271      | 30           | 5                         |
| PFCIRM516_02085 | 1266    | Shaving | polar amino acid ABC transporter, Binding protein component            | Transport/binding of amino-acids                      |           | PSE                           | 30,000                | -26,832      | 26           | 5                         |
| PFCIRM129_03750 | 1305    | CyDye   | Phosphate acetyltransferase                                            | Metabolism of carbohydrates<br>And related molecules  | pta       | CYTO                          | 52,800                | -41,322      | 27           | 10                        |
| PFCIRM456_04975 | 1305    | CyDye   | Phosphate acetyltransferase                                            | Metabolism of carbohydrates<br>And related molecules  | pta       | CYTO                          | 52,700                | -29,589      | 25           | 8                         |
| PFCIRM118_06510 | 1310    | Shaving | 30S ribosomal protein S10                                              | Ribosomal proteins                                    | rpsJ      | CYTO                          | 24,700                | -13,642      | 13           | 2                         |
| PFCIRM118_06520 | 1314    | Shaving | 50S ribosomal protein L2                                               | Ribosomal proteins                                    | rplB      | CYTO                          | 30,300                | -6,636       | 11           | 2                         |
| PFCIRM1_03420   | 1316    | Shaving | 50S ribosomal protein L22                                              | Ribosomal proteins                                    | rplV      | CYTO                          | 29,900                | -10,882      | 12           | 2                         |
| PFCIRM118_06620 | 1335    | Shaving | solute binding protein of the ABC transport system                     | Transport/binding of proteins/peptides                | bopA      | PSE                           | 61,400                | -38,058      | 27           | 13                        |
| PFCIRM129_08120 | 1335    | Shaving | solute binding protein of the ABC transport system                     | Transport/binding of proteins/peptides                | bopA      | PSE                           | 61,400                | -60,005      | 33           | 13                        |
| PFCIRM134_05300 | 1335    | Shaving | solute binding protein of the ABC transport system                     | Transport/binding of proteins/peptides                | bopA      | PSE                           | 61,300                | -94,480      | 39           | 26                        |
| PFCIRM139_03885 | 1335    | Shaving | solute binding protein of the ABC transport system                     | Transport/binding of proteins/peptides                | bopA      | PSE                           | 61,400                | -15,126      | 6            | 2                         |
| PFCIRM456_10340 | 1335    | Shaving | solute binding protein of the ABC transport system                     | Transport/binding of proteins/peptides                | bopA      | PSE                           | 61,600                | -17,081      | 10           | 4                         |
| PFCIRM514_01120 | 1335    | Shaving | solute binding protein of the ABC transport system                     | Transport/binding of proteins/peptides                | bopA      | PSE                           | 61,400                | -172,578     | 50           | 42                        |
| PFCIRM516_06415 | 1335    | Shaving | solute binding protein of the ABC transport system                     | Transport/binding of proteins/peptides                | bopA      | PSE                           | 61,700                | -70,449      | 34           | 22                        |
| PFCIRM1_03510   | 1335    | Shaving | solute binding protein of the ABC transport system                     | Transport/binding of proteins/peptides                | bopA      | PSE                           | 61,400                | -123,828     | 46           | 27                        |
| PFCIRM1_03580   | 1349    | Shaving | 30S ribosomal protein S4                                               | Ribosomal proteins                                    | rpsD      | CYTO                          | 23,200                | -4,564       | 10           | 2                         |
| PFCIRM456_10415 | 1350    | CyDye   | DNA-directed RNA polymerase alpha chain (RNA polymerase subunit alpha) | Transcription elongation                              | rpoA      | CYTO                          | 36,900                | -51,606      | 41           | 12                        |
| PFCIRM139_03980 | 1354    | CyDye   | Resuscitation-promoting factor RpfB                                    | Adaptation to atypical conditions                     |           | SECRETED                      | NA                    | -27,491      | NA           | 7                         |
| PFCIRM118_06715 | 1354    | Shaving | Resuscitation-promoting factor RpfB                                    | Adaptation to atypical conditions                     |           | SECRETED                      | 37,700                | -12,983      | 8            | 2                         |
| PFCIRM121_06075 | 1354    | Shaving | Resuscitation-promoting factor RpfB                                    | Adaptation to atypical conditions                     |           | SECRETED                      | 37,600                | -56,105      | 41           | 9                         |
| PFCIRM122_08000 | 1354    | Shaving | Resuscitation-promoting factor RpfB                                    | Adaptation to atypical conditions                     |           | SECRETED                      | 37,600                | -39,740      | 36           | 9                         |
| PFCIRM129_08025 | 1354    | Shaving | Resuscitation-promoting factor RpfB                                    | Adaptation to atypical conditions                     |           | SECRETED                      | 37,700                | -46,300      | 36           | 9                         |
| PFCIRM134_05395 | 1354    | Shaving | Resuscitation-promoting factor RpfB                                    | Adaptation to atypical conditions                     |           | SECRETED                      | 37,700                | -32,524      | 32           | 7                         |
| PFCIRM139_03980 | 1354    | Shaving | Resuscitation-promoting factor RpfB                                    | Adaptation to atypical conditions                     |           | SECRETED                      | 37,600                | -47,287      | 36           | 9                         |
| PFCIRM456_10430 | 1354    | Shaving | Resuscitation-promoting factor RpfB                                    | Adaptation to atypical conditions                     |           | SECRETED                      | 37,600                | -39,223      | 36           | 9                         |
| PFCIRM514_01030 | 1354    | Shaving | Resuscitation-promoting factor RpfB                                    | Adaptation to atypical conditions                     |           | SECRETED                      | 37,600                | -42,999      | 36           | 9                         |
| PFCIRM516_06320 | 1354    | Shaving | Resuscitation-promoting factor RpfB                                    | Adaptation to atypical conditions                     |           | SECRETED                      | 37,600                | -42,137      | 29           | 7                         |
| PFCIRM527_07030 | 1354    | Shaving | Resuscitation-promoting factor RpfB                                    | Adaptation to atypical conditions                     |           | SECRETED                      | 37,600                | -37,203      | 36           | 9                         |
| PFCIRM1_03605   | 1354    | Shaving | Resuscitation-promoting factor RpfB                                    | Adaptation to atypical conditions                     |           | SECRETED                      | 37,700                | -41,741      | 32           | 7                         |

| Locus Tag       | Cluster | Method  | Description                                                                  | Function                                          | Gene name | SurfG+ Predicted Localization | Molecular Weight (Da) | log(E value) | Coverage (%) | Number Of Unique Peptides |
|-----------------|---------|---------|------------------------------------------------------------------------------|---------------------------------------------------|-----------|-------------------------------|-----------------------|--------------|--------------|---------------------------|
| PFCIRM122_08005 | 1355    | CyDye   | Iron/Manganese superoxide dismutase (Superoxide dismutase [Mn/Fe])           | Detoxification                                    | sodA      | CYTO                          | 22,700                | -14,417      | 12           | 4                         |
| PFCIRM139_03985 | 1355    | CyDye   | Iron/Manganese superoxide dismutase (Superoxide dismutase [Mn/Fe])           | Detoxification                                    | sodA      | CYTO                          | 22,700                | -18,974      | 14           | 5                         |
| PFCIRM138_09035 | 1355    | CyDye   | Iron/Manganese superoxide dismutase (Superoxide dismutase [Mn/Fe])           | Detoxification                                    | sodA      | CYTO                          | 22,700                | -6,650       | 11           | 2                         |
| PFCIRM129_07955 | 1367    | CyDye   | GTP phosphohydrolase (mRNA-translation-assisting)                            | Translation elongation                            |           | CYTO                          | 75,000                | -29,102      | 15           | 7                         |
| PFCIRM118_09520 | 1388    | Shaving | cell-wall peptidases, NlpC/P60 family secreted protein                       | Cell wall                                         |           | SECRETED                      | 59,500                | -25,207      | 12           | 4                         |
| PFCIRM121_09150 | 1388    | Shaving | cell-wall peptidases, NlpC/P60 family secreted protein                       | Cell wall                                         |           | SECRETED                      | 58,700                | -98,081      | 51           | 19                        |
| PFCIRM122_07115 | 1388    | Shaving | cell-wall peptidases, NlpC/P60 family secreted protein                       | Cell wall                                         |           | SECRETED                      | 58,700                | -62,587      | 38           | 14                        |
| PFCIRM129_08670 | 1388    | Shaving | cell-wall peptidases, NlpC/P60 family secreted protein                       | Cell wall                                         |           | SECRETED                      | 58,700                | -57,823      | 36           | 12                        |
| PFCIRM134_09930 | 1388    | Shaving | cell-wall peptidases, NlpC/P60 family secreted protein                       | Cell wall                                         |           | SECRETED                      | 58,700                | -46,394      | 23           | 8                         |
| PFCIRM138_02375 | 1388    | Shaving | cell-wall peptidases, NlpC/P60 family secreted protein                       | Cell wall                                         |           | SECRETED                      | 58,700                | -17,509      | 3            | 2                         |
| PFCIRM139_03330 | 1388    | Shaving | cell-wall peptidases, NlpC/P60 family secreted protein                       | Cell wall                                         |           | SECRETED                      | 59,500                | -68,171      | 44           | 16                        |
| PFCIRM456_09805 | 1388    | Shaving | cell-wall peptidases, NlpC/P60 family secreted protein                       | Cell wall                                         |           | SECRETED                      | 59,600                | -105,230     | 48           | 18                        |
| PFCIRM514_01290 | 1388    | Shaving | cell-wall peptidases, NlpC/P60 family secreted protein                       | Cell wall                                         |           | SECRETED                      | 59,500                | -84,058      | 44           | 16                        |
| PFCIRM516_02730 | 1388    | Shaving | cell-wall peptidases, NlpC/P60 family secreted protein                       | Cell wall                                         |           | SECRETED                      | 59,500                | -65,152      | 36           | 13                        |
| PFCIRM527_10435 | 1388    | Shaving | cell-wall peptidases, NlpC/P60 family secreted protein                       | Cell wall                                         |           | SECRETED                      | 58,700                | -69,221      | 41           | 15                        |
| PFCIRM1_08110   | 1388    | Shaving | cell-wall peptidases, NlpC/P60 family secreted protein                       | Cell wall                                         |           | SECRETED                      | 58,700                | -85,786      | 43           | 15                        |
| PFCIRM121_02000 | 1395    | Shaving | Anaerobic dimethyl sulfoxide reductase chain C                               | Membrane bioenergetics                            | dmsC      | MEMBRANE                      | 23,400                | -8,075       | 10           | 2                         |
| PFCIRM122_03750 | 1395    | Shaving | Anaerobic dimethyl sulfoxide reductase chain C                               | Membrane bioenergetics                            | dmsC      | MEMBRANE                      | 23,400                | -8,523       | 15           | 2                         |
| PFCIRM456_09190 | 1395    | Shaving | Anaerobic dimethyl sulfoxide reductase chain C                               | Membrane bioenergetics                            | dmsC      | MEMBRANE                      | 23,400                | -8,433       | 15           | 3                         |
| PFCIRM121_01995 | 1396    | Shaving | Anaerobic dimethyl sulfoxide reductase chain A                               | Membrane bioenergetics                            | dmsA      | CYTO                          | 95,700                | -28,759      | 9            | 5                         |
| PFCIRM122_03755 | 1396    | Shaving | Anaerobic dimethyl sulfoxide reductase chain A                               | Membrane bioenergetics                            | dmsA      | CYTO                          | 96,900                | -21,657      | 5            | 4                         |
| PFCIRM139_00505 | 1396    | Shaving | Anaerobic dimethyl sulfoxide reductase chain A                               | Membrane bioenergetics                            | dmsA      | CYTO                          | 96,900                | -14,338      | 4            | 3                         |
| PFCIRM456_09185 | 1396    | Shaving | Anaerobic dimethyl sulfoxide reductase chain A                               | Membrane bioenergetics                            | dmsA      | CYTO                          | 96,300                | -27,746      | 8            | 5                         |
| PFCIRM129_06835 | 1411    | Shaving | 50S ribosomal protein L21                                                    | Ribosomal proteins                                | rplU      | CYTO                          | 9,200                 | -4,286       | 30           | 2                         |
| PFCIRM1_08260   | 1413    | CyDye   | GTPase                                                                       | Miscellaneous                                     | obg       | CYTO                          | 57,200                | -21,852      | 15           | 5                         |
| PFCIRM118_11870 | 1413    | CyDye   | GTPase                                                                       | Miscellaneous                                     | obg       | CYTO                          | 57,200                | -6,213       | 5            | 2                         |
| PFCIRM516_07805 | 1416    | CyDye   | Gamma-glutamyl phosphate reductase (Glutamate-5- semialdehyde dehydrogenase) | Metabolism of carbohydrates And related molecules | proA      | CYTO                          | NA                    | -5,062       | NA           | 3                         |
| PFCIRM134_07290 | 1467    | CyDye   | Aspartyl-tRNA synthetase (Aspartate-tRNA ligase) (AsPRS)                     | .Aminoacyl-tRNA synthetases                       | aspS      | CYTO                          | 67,200                | -33,092      | 13           | 7                         |
| PFCIRM456_02495 | 1472    | Shaving | Glycine cleavage system T protein, Aminomethyltransferase                    | Metabolism of amino acids And related molecules   | gcvT1     | CYTO                          | 43,700                | -6,827       | 9            | 2                         |
| PFCIRM514_10565 | 1472    | Shaving | Glycine cleavage system T protein, Aminomethyltransferase                    | Metabolism of amino acids And related molecules   | gcvT1     | CYTO                          | 43,700                | -10,840      | 9            | 3                         |
| PFCIRM514_00620 | 1483    | Shaving | Hypothetical secreted protein                                                | Pouf similar to proteins from other organisms     |           | PSE                           | 35,100                | -16,917      | 10           | 2                         |
| PFCIRM527_02215 | 1483    | Shaving | Hypothetical secreted protein                                                | Pouf similar to proteins from other organisms     |           | PSE                           | 35,100                | -7,511       | 8            | 2                         |
| PFCIRM1_08775   | 1483    | Shaving | Hypothetical secreted protein                                                | Pouf similar to proteins from other organisms     |           | PSE                           | 35,100                | -12,222      | 16           | 2                         |



| Locus Tag       | Cluster | Method  | Description                                                       | Function                                                        | Gene name | SurfG+ Predicted Localization | Molecular Weight (Da) | log(E value) | Coverage (%) | Number Of Unique Peptides |
|-----------------|---------|---------|-------------------------------------------------------------------|-----------------------------------------------------------------|-----------|-------------------------------|-----------------------|--------------|--------------|---------------------------|
| PFCIRM122_08375 | 1489    | CyDye   | AziC family protein precursor (amino acid permease)               | Transport/binding of amino-acids                                | aziC      | MEMBRANE                      | 34,800                | -23,296      | 26           | 7                         |
| PFCIRM129_07645 | 1489    | CyDye   | AziC family protein precursor (amino acid permease)               | Transport/binding of amino-acids                                | aziC      | MEMBRANE                      | 34,800                | -8,337       | 17           | 3                         |
| PFCIRM134_05770 | 1489    | CyDye   | AziC family protein precursor (amino acid permease)               | Transport/binding of amino-acids                                | aziC      | MEMBRANE                      | 34,800                | -27,976      | 29           | 10                        |
| PFCIRM139_04370 | 1489    | CyDye   | AziC family protein precursor (amino acid permease)               | Transport/binding of amino-acids                                | aziC      | MEMBRANE                      | 34,800                | -28,841      | 30           | 10                        |
| PFCIRM514_00650 | 1489    | CyDye   | AziC family protein precursor (amino acid permease)               | Transport/binding of amino-acids                                | aziC      | MEMBRANE                      | 34,800                | -34,627      | 39           | 11                        |
| PFCIRM1_08810   | 1489    | CyDye   | AziC family protein precursor (amino acid permease)               | Transport/binding of amino-acids<br>Metabolism of carbohydrates | mdh       | CYTO                          | 34,800                | -5,263       | 9            | 2                         |
| PFCIRM118_07085 | 1489    | CyDye   | Malate dehydrogenase                                              | And related molecules<br>Metabolism of carbohydrates            | mdh       | CYTO                          | 34,800                | -35,748      | 28           | 8                         |
| PFCIRM138_11215 | 1489    | CyDye   | Malate dehydrogenase                                              | And related molecules<br>Metabolism of carbohydrates            | mdh       | CYTO                          | 34,800                | -36,223      | 27           | 8                         |
| PFCIRM527_02175 | 1489    | CyDye   | Malate dehydrogenase                                              | And related molecules                                           | mdh       | CYTO                          | 34,800                | -31,324      | 27           | 8                         |
| PFCIRM118_07085 | 1489    | Shaving | AziC family protein precursor (amino acid permease)               | Transport/binding of amino-acids                                | aziC      | MEMBRANE                      | 34,800                | -7,126       | 9            | 2                         |
| PFCIRM139_04370 | 1489    | Shaving | AziC family protein precursor (amino acid permease)               | Transport/binding of amino-acids                                | aziC      | MEMBRANE                      | 34,800                | -8,234       | 9            | 2                         |
| PFCIRM516_05945 | 1489    | Shaving | AziC family protein precursor (amino acid permease)               | Transport/binding of amino-acids                                | aziC      | MEMBRANE                      | 34,800                | -4,796       | 9            | 2                         |
| PFCIRM122_00770 | 1506    | CyDye   | Hypothetical protein                                              | Pouf similar to proteins from other organisms                   |           | CYTO                          | 23,100                | -11,873      | 26           | 3                         |
| PFCIRM134_04800 | 1506    | CyDye   | Hypothetical protein                                              | Pouf similar to proteins from other organisms                   |           | CYTO                          | 23,100                | -14,205      | 33           | 5                         |
| PFCIRM139_11245 | 1506    | CyDye   | Hypothetical protein                                              | Pouf similar to proteins from other organisms                   |           | CYTO                          | 23,100                | -12,571      | 23           | 4                         |
| PFCIRM456_11770 | 1506    | CyDye   | Hypothetical protein                                              | Pouf similar to proteins from other organisms                   |           | CYTO                          | 23,100                | -8,883       | 17           | 3                         |
| PFCIRM139_11245 | 1506    | Shaving | Hypothetical protein                                              | Pouf similar to proteins from other organisms                   |           | CYTO                          | 23,100                | -9,597       | 26           | 4                         |
| PFCIRM134_04805 | 1507    | Shaving | iron-sulfur protein                                               | Membrane bioenergetics                                          |           | CYTO                          | 57,200                | -18,648      | 8            | 3                         |
| PFCIRM118_01135 | 1515    | Shaving | Hypothetical protein                                              | Pouf, without similarity to other proteins                      |           | PSE                           | 24,400                | -25,364      | 26           | 3                         |
| PFCIRM134_12655 | 1515    | Shaving | Hypothetical protein                                              | Pouf, without similarity to other proteins                      |           | PSE                           | 24,500                | -20,986      | 22           | 3                         |
| PFCIRM514_08110 | 1515    | Shaving | Hypothetical protein                                              | Pouf, without similarity to other proteins                      |           | PSE                           | 24,400                | -10,890      | 9            | 3                         |
| PFCIRM1_08955   | 1515    | Shaving | Hypothetical protein                                              | Pouf, without similarity to other proteins                      |           | PSE                           | 24,100                | -18,621      | 26           | 4                         |
| PFCIRM121_10030 | 1553    | Shaving | penicillin-binding protein<br>(peptidoglycan glycosyltransferase) | Cell wall                                                       | mrc/ponA  | PSE                           | 75,300                | -41,584      | 19           | 9                         |
| PFCIRM122_08625 | 1553    | Shaving | penicillin-binding protein<br>(peptidoglycan glycosyltransferase) | Cell wall                                                       | mrc/ponA  | PSE                           | 77,600                | -44,185      | 18           | 8                         |
| PFCIRM134_02320 | 1553    | Shaving | penicillin-binding protein<br>(peptidoglycan glycosyltransferase) | Cell wall                                                       | mrc/ponA  | PSE                           | 77,500                | -16,246      | 11           | 3                         |
| PFCIRM456_11945 | 1553    | Shaving | penicillin-binding protein<br>(peptidoglycan glycosyltransferase) | Cell wall                                                       | mrc/ponA  | PSE                           | 77,500                | -29,316      | 16           | 7                         |
| PFCIRM514_06620 | 1553    | Shaving | penicillin-binding protein<br>(peptidoglycan glycosyltransferase) | Cell wall                                                       | mrc/ponA  | PSE                           | 77,600                | -53,223      | 21           | 10                        |
| PFCIRM516_12415 | 1553    | Shaving | penicillin-binding protein<br>(peptidoglycan glycosyltransferase) | Cell wall                                                       | mrc/ponA  | PSE                           | 75,300                | -52,637      | 28           | 12                        |
| PFCIRM527_06860 | 1553    | Shaving | penicillin-binding protein<br>(peptidoglycan glycosyltransferase) | Cell wall                                                       | mrc/ponA  | PSE                           | 75,300                | -20,748      | 11           | 4                         |
| PFCIRM1_09170   | 1553    | Shaving | penicillin-binding protein<br>(peptidoglycan glycosyltransferase) | Cell wall                                                       | mrc/ponA  | PSE                           | 75,200                | -39,842      | 19           | 8                         |

| Locus Tag       | Cluster | Method  | Description                                              | Function                                          | Gene name | SurfG+ Predicted Localization | Molecular Weight (Da) | log(E value) | Coverage (%) | Number Of Unique Peptides |
|-----------------|---------|---------|----------------------------------------------------------|---------------------------------------------------|-----------|-------------------------------|-----------------------|--------------|--------------|---------------------------|
| PFCIRM122_11195 | 1599    | CyDye   | Membrane protease subunits, Stomatin/prohibitin homologs | Protein degradation                               |           | MEMBRANE                      | 33,500                | -15,525      | 28           | 4                         |
| PFCIRM134_01600 | 1599    | CyDye   | Membrane protease subunits, Stomatin/prohibitin homologs | Protein degradation                               |           | MEMBRANE                      | 33,500                | -15,011      | 22           | 3                         |
| PFCIRM139_11500 | 1599    | CyDye   | Membrane protease subunits, Stomatin/prohibitin homologs | Protein degradation                               |           | MEMBRANE                      | NA                    | -80,100      | NA           | 18                        |
| PFCIRM514_01860 | 1599    | CyDye   | Membrane protease subunits, Stomatin/prohibitin homologs | Protein degradation                               |           | MEMBRANE                      | 33,500                | -129,461     | 69           | 25                        |
| PFCIRM516_04965 | 1599    | CyDye   | Membrane protease subunits, Stomatin/prohibitin homologs | Protein degradation                               |           | MEMBRANE                      | 33,500                | -23,600      | 37           | 5                         |
| PFCIRM1_09420   | 1599    | CyDye   | Stomatin/prohibitin homologs                             | Protein degradation                               | cys2      | CYTO                          | 33,500                | -76,304      | 64           | 13                        |
| PFCIRM118_04615 | 1599    | CyDye   | cysteine synthase 2                                      | Metabolism of carbohydrates And related molecules | cys2      | CYTO                          | 33,500                | -86,796      | 60           | 16                        |
| PFCIRM138_09490 | 1599    | CyDye   | cysteine synthase 2                                      | Metabolism of carbohydrates And related molecules | cys2      | CYTO                          | 33,500                | -93,505      | 68           | 15                        |
| PFCIRM527_00170 | 1599    | CyDye   | cysteine synthase 2                                      | Metabolism of carbohydrates And related molecules | cys2      | CYTO                          | 33,500                | -99,643      | 68           | 15                        |
| PFCIRM134_01600 | 1599    | CIGua   | Membrane protease subunits, Stomatin/prohibitin homologs | Protein degradation                               |           | MEMBRANE                      | 33,500                | -36,541      | 37           | 8                         |
| PFCIRM118_01345 | 1613    | Shaving | Hypothetical protein                                     | Pouf, without similarity to other proteins        |           | PSE                           | 29,900                | -31,809      | 26           | 5                         |
| PFCIRM121_03250 | 1613    | Shaving | Hypothetical protein                                     | Pouf, without similarity to other proteins        |           | PSE                           | 29,900                | -12,241      | 24           | 3                         |
| PFCIRM134_02745 | 1613    | Shaving | Hypothetical protein                                     | Pouf, without similarity to other proteins        |           | PSE                           | 29,900                | -16,282      | 15           | 3                         |
| PFCIRM139_10165 | 1613    | Shaving | Hypothetical protein                                     | Pouf, without similarity to other proteins        |           | PSE                           | 30,000                | -10,055      | 15           | 2                         |
| PFCIRM456_05235 | 1613    | Shaving | Hypothetical protein                                     | Pouf, without similarity to other proteins        |           | PSE                           | 29,900                | -21,560      | 24           | 4                         |
| PFCIRM514_08320 | 1613    | Shaving | Hypothetical protein                                     | Pouf, without similarity to other proteins        |           | PSE                           | 30,000                | -17,182      | 12           | 2                         |
| PFCIRM516_01875 | 1613    | Shaving | Hypothetical protein                                     | Pouf, without similarity to other proteins        |           | PSE                           | 29,900                | -18,679      | 20           | 3                         |
| PFCIRM527_06050 | 1613    | Shaving | Hypothetical protein                                     | Pouf, without similarity to other proteins        |           | PSE                           | 29,900                | -27,164      | 29           | 5                         |
| PFCIRM1_09755   | 1613    | Shaving | Hypothetical protein                                     | Pouf, without similarity to other proteins        |           | PSE                           | 30,000                | -19,171      | 20           | 3                         |
| PFCIRM1_09895   | 1640    | CyDye   | Phosphoketolase pyrophosphate                            | Main glycolytic pathways                          | phk       | CYTO                          | 96,600                | -37,005      | 12           | 8                         |
| PFCIRM138_02615 | 1640    | CyDye   | Phosphoketolase pyrophosphate                            | Main glycolytic pathways                          | phk       | CYTO                          | 96,600                | -22,711      | 8            | 6                         |
| PFCIRM527_11260 | 1640    | CyDye   | Phosphoketolase pyrophosphate                            | Main glycolytic pathways                          | phk       | CYTO                          | 96,600                | -19,550      | 8            | 6                         |
| PFCIRM139_06195 | 1644    | Shaving | Anaerobic glycerol-3-phosphate dehydrogenase Subunit C   | Specific carbohydrate metabolic pathway           | glpC      | CYTO                          | 50,500                | -9,730       | 5            | 2                         |
| PFCIRM134_00210 | 1645    | CyDye   | Anaerobic glycerol-3-phosphate dehydrogenase Subunit B   | Specific carbohydrate metabolic pathway           | glpB      | CYTO                          | 45,800                | -51,329      | 42           | 13                        |
| PFCIRM516_02950 | 1645    | CyDye   | Anaerobic glycerol-3-phosphate dehydrogenase Subunit B   | Specific carbohydrate metabolic pathway           | glpB      | CYTO                          | 45,800                | -44,521      | 36           | 10                        |
| PFCIRM139_07805 | 1689    | CyDye   | DNA polymerase III, beta chain                           | DNA replication                                   | dnaN      | CYTO                          | 41,400                | -25,866      | 21           | 8                         |
| PFCIRM129_05460 | 1692    | CyDye   | surface layer protein E (S-layer protein E)              | Cell wall                                         | slpE      | PSE                           | 59,200                | -8,677       | 4            | 2                         |
| PFCIRM129_05460 | 1692    | CIGua   | surface layer protein E (S-layer protein E)              | Cell wall                                         | slpE      | PSE                           | 59,200                | -35,405      | 15           | 6                         |
| PFCIRM129_05460 | 1692    | Shaving | surface layer protein E (S-layer protein E)              | Cell wall                                         | slpE      | PSE                           | 59,200                | -67,512      | 48           | 17                        |
| PFCIRM134_00130 | 1729    | CyDye   | 2-dehydropanoate 2-reductase                             | Metabolism of coenzymes and prosthetic groups     | panE      | CYTO                          | 32,200                | -5,860       | 8            | 2                         |
| PFCIRM516_03005 | 1732    | CyDye   | L-lactate dehydrogenase                                  | Main glycolytic pathways                          | ldh2      | CYTO                          | 34,000                | -32,193      | 27           | 8                         |
| PFCIRM138_02650 | 1732    | CyDye   | L-lactate dehydrogenase                                  | Main glycolytic pathways                          | ldh2      | CYTO                          | 33,900                | -27,178      | 19           | 6                         |
| PFCIRM456_03765 | 1749    | CyDye   | Carboxylic ester hydrolase                               | Metabolism of lipids                              | pf667     | CYTO                          | 34,100                | -23,663      | 30           | 6                         |
| PFCIRM516_12170 | 1749    | CyDye   | Carboxylic ester hydrolase                               | Metabolism of lipids                              | pf667     | CYTO                          | 34,100                | -9,208       | 11           | 3                         |
| PFCIRM456_05745 | 1775    | CyDye   | 2-deoxy-D-gluconate 3-dehydrogenase                      |                                                   | kduD      | CYTO                          | 43,300                | -21,857      | 16           | 4                         |

| Locus Tag       | Cluster | Method  | Description                                                                            | Function                                                                         | Gene name | SurfG+ Predicted Localization | Molecular Weight (Da) | log(E value) | Coverage (%) | Number Of Unique Peptides |
|-----------------|---------|---------|----------------------------------------------------------------------------------------|----------------------------------------------------------------------------------|-----------|-------------------------------|-----------------------|--------------|--------------|---------------------------|
| PFCIRM139_06215 | 1792    | Shaving | Vitamin B12-dependent ribonucleotide reductase                                         | Metabolism of nucleotides and nucleic acids                                      | nrdJ      | CYTO                          | 104,700               | -13,347      | 5            | 3                         |
| PFCIRM122_05720 | 1796    | CyDye   | Heat shock protein 20 1 (20 kDa chaperone 1)                                           | Protein folding                                                                  | hsp20 1   | CYTO                          | 16,900                | -37,325      | 55           | 7                         |
| PFCIRM527_11760 | 1796    | CyDye   | Heat shock protein 20 1 (20 kDa chaperone 1)                                           | Protein folding                                                                  | hsp20 1   | CYTO                          | 16,900                | -59,483      | 70           | 8                         |
| PFCIRM139_07475 | 1796    | Shaving | Heat shock protein 20 1 (20 kDa chaperone 1)                                           | Protein folding                                                                  | hsp20 1   | CYTO                          | 16,900                | -10,900      | 25           | 2                         |
| PFCIRM1_12075   | 1796    | Shaving | Heat shock protein 20 1 (20 kDa chaperone 1)                                           | Protein folding                                                                  | hsp20 1   | CYTO                          | 17,200                | -19,260      | 25           | 2                         |
| PFCIRM456_05685 | 1815    | Shaving | Hypothetical protein                                                                   | Pouf, without similarity to other proteins                                       |           | CYTO                          | 7,300                 | -7,578       | 38           | 2                         |
| PFCIRM516_10780 | 1815    | Shaving | Hypothetical protein                                                                   | Pouf, without similarity to other proteins                                       |           | CYTO                          | 7,300                 | -13,112      | 53           | 3                         |
| PFCIRM1_00200   | 1833    | Shaving | Cell envelope-related function transcriptional attenuator common d                     | Transcription regulation<br>Metabolism of carbohydrates<br>And related molecules | cpsA1     | PSE                           | 58,700                | -6,130       | 5            | 2                         |
| PFCIRM134_08195 | 1866    | Shaving | D-lactate dehydrogenase                                                                |                                                                                  | dld       | CYTO                          | 63,600                | -15,106      | 13           | 5                         |
| PFCIRM134_09495 | 1869    | Shaving | Trypsin-like serine protease                                                           | Transport/binding of proteins/peptides                                           | htrA3     | PSE                           | 46,100                | -11,154      | 7            | 2                         |
| PFCIRM456_11855 | 1869    | Shaving | Trypsin-like serine protease                                                           | Transport/binding of proteins/peptides                                           | htrA3     | PSE                           | 46,300                | -19,534      | 8            | 2                         |
| PFCIRM516_11160 | 1869    | Shaving | Trypsin-like serine protease                                                           | Transport/binding of proteins/peptides                                           | htrA3     | PSE                           | 46,100                | -23,395      | 16           | 4                         |
| PFCIRM1_00590   | 1869    | Shaving | Trypsin-like serine protease<br>Penicillin-binding protein                             | Transport/binding of proteins/peptides                                           | htrA3     | PSE                           | 45,900                | -20,022      | 12           | 3                         |
| PFCIRM118_05525 | 1871    | Shaving | (Transglycosylase/transpeptidase)<br>Penicillin-binding protein                        | Cell wall                                                                        | ponA      | SECRETED                      | 77,800                | -57,144      | 19           | 10                        |
| PFCIRM121_04405 | 1871    | Shaving | (Transglycosylase/transpeptidase)<br>Penicillin-binding protein                        | Cell wall                                                                        | ponA      | SECRETED                      | 77,800                | -90,147      | 41           | 16                        |
| PFCIRM122_09570 | 1871    | Shaving | (Transglycosylase/transpeptidase)<br>Penicillin-binding protein                        | Cell wall                                                                        | ponA      | SECRETED                      | 77,800                | -68,602      | 33           | 15                        |
| PFCIRM129_10570 | 1871    | Shaving | (Transglycosylase/transpeptidase)<br>Penicillin-binding protein                        | Cell wall                                                                        | ponA      | SECRETED                      | 77,800                | -64,186      | 28           | 14                        |
| PFCIRM134_11530 | 1871    | Shaving | (Transglycosylase/transpeptidase)<br>Penicillin-binding protein                        | Cell wall                                                                        | ponA      | SECRETED                      | 77,800                | -49,125      | 25           | 11                        |
| PFCIRM139_00390 | 1871    | Shaving | (Transglycosylase/transpeptidase)<br>Penicillin-binding protein                        | Cell wall                                                                        | ponA      | SECRETED                      | 77,800                | -72,676      | 34           | 15                        |
| PFCIRM456_04145 | 1871    | Shaving | (Transglycosylase/transpeptidase)<br>Penicillin-binding protein                        | Cell wall                                                                        | ponA      | SECRETED                      | 77,800                | -113,950     | 42           | 22                        |
| PFCIRM514_07250 | 1871    | Shaving | (Transglycosylase/transpeptidase)<br>Penicillin-binding protein                        | Cell wall                                                                        | ponA      | SECRETED                      | 77,800                | -52,983      | 25           | 10                        |
| PFCIRM516_10390 | 1871    | Shaving | (Transglycosylase/transpeptidase)<br>Penicillin-binding protein                        | Cell wall                                                                        | ponA      | SECRETED                      | 77,800                | -87,235      | 33           | 19                        |
| PFCIRM527_04365 | 1871    | Shaving | (Transglycosylase/transpeptidase)<br>Penicillin-binding protein                        | Cell wall                                                                        | ponA      | SECRETED                      | 77,900                | -76,983      | 36           | 18                        |
| PFCIRM1_00605   | 1871    | Shaving | (Transglycosylase/transpeptidase)                                                      | Cell wall                                                                        | ponA      | SECRETED                      | 77,800                | -138,177     | 43           | 27                        |
| PFCIRM134_02140 | 1900    | CyDye   | Oxidoreductase                                                                         | Miscellaneous                                                                    |           | CYTO                          | 23,300                | -24,646      | 41           | 6                         |
| PFCIRM122_00205 | 1901    | CyDye   | Transcriptional regulator, TetR family                                                 | Transcription regulation                                                         | tetR1     | CYTO                          | 25,400                | -13,614      | 10           | 2                         |
| PFCIRM139_07635 | 1902    | Shaving | drug exporters of the RND superfamily                                                  | Adaptation to atypical conditions                                                |           | PSE                           | 87,500                | -59,222      | 16           | 9                         |
| PFCIRM514_07875 | 1949    | CyDye   | Dihydroorotate dehydrogenase                                                           | Metabolism of nucleotides and nucleic acids                                      |           | CYTO                          | 40,600                | -60,958      | 53           | 15                        |
| PFCIRM118_10645 | 1971    | CyDye   | Adenylosuccinate synthetase (IMP--aspartate ligase)                                    | Metabolism of nucleotides and nucleic acids                                      | purA      | CYTO                          | 46,400                | -33,595      | 25           | 8                         |
| PFCIRM527_09405 | 1971    | CyDye   | Adenylosuccinate synthetase (IMP--aspartate ligase)<br>Aspartyl/glutamyl-tRNA(Asn/Gln) | Metabolism of nucleotides and nucleic acids                                      | purA      | CYTO                          | 46,400                | -7,585       | 9            | 3                         |
| PFCIRM118_00325 | 2015    | CyDye   | Amidotransferase subunit B                                                             | Protein synthesis                                                                | gatB      | CYTO                          | 54,700                | -12,246      | 13           | 4                         |

| Locus Tag       | Cluster | Method  | Description                                                              | Function                                   | Gene name | SurfG+ Predicted Localization | Molecular Weight (Da) | log(E value) | Coverage (%) | Number Of Unique Peptides |
|-----------------|---------|---------|--------------------------------------------------------------------------|--------------------------------------------|-----------|-------------------------------|-----------------------|--------------|--------------|---------------------------|
| PFCIRM122_06340 | 2027    | CyDye   | 60 kDa chaperonin 2 (Protein Cpn60 2) (groEL protein 2)                  | Protein folding                            | groL2     | CYTO                          | 56,400                | -81,577      | 41           | 17                        |
| PFCIRM134_04720 | 2027    | CyDye   | 60 kDa chaperonin 2 (Protein Cpn60 2) (groEL protein 2)                  | Protein folding                            | groL2     | CYTO                          | 56,400                | -88,691      | 44           | 19                        |
| PFCIRM139_11320 | 2027    | CyDye   | 60 kDa chaperonin 2 (Protein Cpn60 2) (groEL protein 2)                  | Protein folding                            | groL2     | CYTO                          | 56,400                | -67,173      | 40           | 15                        |
| PFCIRM1_01975   | 2027    | CyDye   | 60 kDa chaperonin 2 (Protein Cpn60 2) (groEL protein 2)                  | Protein folding                            | groL2     | CYTO                          | 56,400                | -76,222      | 33           | 12                        |
| PFCIRM138_06020 | 2027    | CyDye   | 60 kDa chaperonin 2 (Protein Cpn60 2) (groEL protein 2)                  | Protein folding                            | groL2     | CYTO                          | 56,400                | -124,389     | 45           | 19                        |
| PFCIRM527_09805 | 2027    | CyDye   | 60 kDa chaperonin 2 (Protein Cpn60 2) (groEL protein 2)                  | Protein folding                            | groL2     | CYTO                          | 56,400                | -121,820     | 46           | 21                        |
| PFCIRM134_04720 | 2027    | CIGua   | 60 kDa chaperonin 2 (Protein Cpn60 2) (groEL protein 2)                  | Protein folding                            | groL2     | CYTO                          | 56,400                | -49,222      | 24           | 9                         |
| PFCIRM118_10235 | 2027    | Shaving | 60 kDa chaperonin 2 (Protein Cpn60 2) (groEL protein 2)                  | Protein folding                            | groL2     | CYTO                          | 56,400                | -38,316      | 21           | 8                         |
| PFCIRM129_10100 | 2027    | Shaving | 60 kDa chaperonin 2 (Protein Cpn60 2) (groEL protein 2)                  | Protein folding                            | groL2     | CYTO                          | 56,400                | -11,724      | 5            | 2                         |
| PFCIRM134_04720 | 2027    | Shaving | 60 kDa chaperonin 2 (Protein Cpn60 2) (groEL protein 2)                  | Protein folding                            | groL2     | CYTO                          | 56,400                | -32,423      | 23           | 8                         |
| PFCIRM139_11320 | 2027    | Shaving | 60 kDa chaperonin 2 (Protein Cpn60 2) (groEL protein 2)                  | Protein folding                            | groL2     | CYTO                          | 56,400                | -25,832      | 17           | 6                         |
| PFCIRM516_10965 | 2027    | Shaving | 60 kDa chaperonin 2 (Protein Cpn60 2) (groEL protein 2)                  | Protein folding                            | groL2     | CYTO                          | 56,400                | -14,845      | 9            | 2                         |
| PFCIRM1_01975   | 2027    | Shaving | 60 kDa chaperonin 2 (Protein Cpn60 2) (groEL protein 2)                  | Protein folding                            | groL2     | CYTO                          | 56,400                | -26,791      | 18           | 6                         |
| PFCIRM516_00220 | 2036    | CyDye   | Fructose-bisphosphate aldolase class I                                   | Main glycolytic pathways                   | fba2      | CYTO                          | 32,200                | -35,952      | 42           | 9                         |
| PFCIRM1_02085   | 2036    | CyDye   | Fructose-bisphosphate aldolase class I                                   | Main glycolytic pathways                   | fba2      | CYTO                          | 32,200                | -38,417      | 50           | 9                         |
| PFCIRM122_12120 | 2057    | CyDye   | Glycerol kinase (ATP:glycerol 3-phosphotransferase) (Glycerokinase) (GK) | Specific carbohydrate metabolic pathway    | glpK      | CYTO                          | 55,600                | -24,957      | 15           | 5                         |
| PFCIRM456_08580 | 2057    | CyDye   | Glycerol kinase (ATP:glycerol 3-phosphotransferase) (Glycerokinase) (GK) | Specific carbohydrate metabolic pathway    | glpK      | CYTO                          | 55,600                | -21,041      | 13           | 5                         |
| PFCIRM527_01085 | 2057    | CyDye   | Glycerol kinase (ATP:glycerol 3-phosphotransferase) (Glycerokinase) (GK) | Specific carbohydrate metabolic pathway    | glpK      | CYTO                          | 55,600                | -54,770      | 31           | 12                        |
| PFCIRM118_07490 | 2072    | CyDye   | Methylmalonyl-CoA mutase large subunit                                   | Specific carbohydrate metabolic pathway    | mutB      | CYTO                          | 80,000                | -105,297     | 38           | 19                        |
| PFCIRM118_07490 | 2072    | Shaving | Methylmalonyl-CoA mutase large subunit                                   | Specific carbohydrate metabolic pathway    | mutB      | CYTO                          | 80,000                | -19,964      | 8            | 4                         |
| PFCIRM122_05020 | 2072    | Shaving | Methylmalonyl-CoA mutase large subunit                                   | Specific carbohydrate metabolic pathway    | mutB      | CYTO                          | 80,000                | -7,152       | 4            | 2                         |
| PFCIRM129_07240 | 2072    | Shaving | Methylmalonyl-CoA mutase large subunit                                   | Specific carbohydrate metabolic pathway    | mutB      | CYTO                          | 80,100                | -7,877       | 3            | 2                         |
| PFCIRM134_06200 | 2072    | Shaving | Methylmalonyl-CoA mutase large subunit                                   | Specific carbohydrate metabolic pathway    | mutB      | CYTO                          | 80,000                | -17,165      | 7            | 3                         |
| PFCIRM122_05025 | 2073    | CyDye   | Methylmalonyl-CoA mutase small subunit                                   | Specific carbohydrate metabolic pathway    | mutA      | CYTO                          | 69,300                | -34,339      | 20           | 12                        |
| PFCIRM129_07235 | 2073    | CyDye   | Methylmalonyl-CoA mutase small subunit                                   | Specific carbohydrate metabolic pathway    | mutA      | CYTO                          | 69,500                | -80,319      | 40           | 20                        |
| PFCIRM118_07495 | 2073    | Shaving | Methylmalonyl-CoA mutase small subunit                                   | Specific carbohydrate metabolic pathway    | mutA      | CYTO                          | 69,300                | -10,203      | 7            | 3                         |
| PFCIRM129_07235 | 2073    | Shaving | Methylmalonyl-CoA mutase small subunit                                   | Specific carbohydrate metabolic pathway    | mutA      | CYTO                          | 69,500                | -12,045      | 6            | 3                         |
| PFCIRM134_06205 | 2073    | Shaving | Methylmalonyl-CoA mutase small subunit                                   | Specific carbohydrate metabolic pathway    | mutA      | CYTO                          | 69,300                | -4,687       | 4            | 2                         |
| PFCIRM134_04125 | 2098    | CyDye   | Glutamine synthetase                                                     | Metabolism of nitrogen/nitrate and nitrite | glnA1     | CYTO                          | 54,000                | -18,498      | 11           | 4                         |
| PFCIRM118_04390 | 2098    | CyDye   | Glutamine synthetase                                                     | Metabolism of nitrogen/nitrate and nitrite | glnA1     | CYTO                          | 54,000                | -7,497       | 5            | 2                         |
| PFCIRM138_02025 | 2098    | CyDye   | Glutamine synthetase                                                     | Metabolism of nitrogen/nitrate and nitrite | glnA1     | CYTO                          | 54,000                | -89,215      | 39           | 16                        |

| Locus Tag       | Cluster | Method  | Description                                                                      | Function                                          | Gene name   | SurfG+ Predicted Localization | Molecular Weight (Da) | log(E value) | Coverage (%) | Number Of Unique Peptides |
|-----------------|---------|---------|----------------------------------------------------------------------------------|---------------------------------------------------|-------------|-------------------------------|-----------------------|--------------|--------------|---------------------------|
| PFCIRM121_06890 | 2106    | Shaving | Cell envelope-related transcriptional attenuator                                 | Transcription regulation                          |             | PSE                           | 90,300                | -6,858       | 4            | 2                         |
| PFCIRM456_01865 | 2106    | Shaving | Cell envelope-related transcriptional attenuator                                 | Transcription regulation                          |             | PSE                           | 89,700                | -9,076       | 2            | 2                         |
| PFCIRM514_07715 | 2106    | Shaving | Cell envelope-related transcriptional attenuator                                 | Transcription regulation                          |             | PSE                           | 89,700                | -12,994      | 5            | 3                         |
| PFCIRM516_03570 | 2106    | Shaving | Cell envelope-related transcriptional attenuator                                 | Transcription regulation                          |             | PSE                           | 89,800                | -6,890       | 4            | 2                         |
| PFCIRM1_02665   | 2106    | Shaving | Cell envelope-related transcriptional attenuator                                 | Transcription regulation                          |             | PSE                           | 89,700                | -12,101      | 7            | 3                         |
| PFCIRM516_01560 | 2152    | CyDye   | Dihydropicolinate synthase                                                       | Metabolism of amino acids and related molecules   | dapA        | CYTO                          | 30,700                | -22,487      | 23           | 4                         |
| PFCIRM527_08455 | 2192    | CyDye   | Electron transfer flavoprotein-quinone oxidoreductase (FixC protein)             | Membrane bioenergetics                            | fixC (ydiS) | CYTO                          | 46,400                | -43,842      | 25           | 7                         |
| PFCIRM122_11245 | 2275    | CyDye   | Aspartate ammonia-lyase                                                          | Metabolism of amino acids and related molecules   | aspA2       | CYTO                          | 52,900                | -40,896      | 31           | 12                        |
| PFCIRM516_04135 | 2491    | CyDye   | Chaperone clpB 1 (ATP-dependent Clp protease B1) (Clp chaperone)                 | Protein folding                                   | clpB 1      | CYTO                          | 94,300                | -151,878     | 49           | 37                        |
| PFCIRM516_09600 | 2659    | Shaving | Putative uncharacterized protein                                                 | Pouf                                              |             | PSE                           | 28,200                | -10,498      | 10           | 3                         |
| PFCIRM134_01465 | 2670    | Shaving | protein of unknown function                                                      | Pouf, without similarity to other proteins        |             | PSE                           | 36,600                | -10,728      | 9            | 2                         |
| PFCIRM118_01990 | 2973    | CyDye   | Alpha-glucan phosphorylase                                                       | Metabolism of carbohydrates and related molecules | glgP        | CYTO                          | 94,600                | -7,000       | 3            | 2                         |
| PFCIRM118_00365 | 3222    | Shaving | Beta-lactamase                                                                   | Detoxification                                    |             | CYTO                          | 18,800                | -14,106      | 7            | 2                         |
| PFCIRM121_03325 | 3222    | Shaving | Beta-lactamase                                                                   | Detoxification                                    |             | CYTO                          | 20,300                | -24,832      | 37           | 5                         |
| PFCIRM134_04450 | 3222    | Shaving | Beta-lactamase                                                                   | Detoxification                                    |             | CYTO                          | 20,300                | -8,606       | 7            | 2                         |
| PFCIRM514_11870 | 3222    | Shaving | Beta-lactamase                                                                   | Detoxification                                    |             | CYTO                          | 18,800                | -37,812      | 34           | 6                         |
| PFCIRM516_11255 | 3222    | Shaving | Beta-lactamase                                                                   | Detoxification                                    |             | CYTO                          | 20,300                | -36,365      | 28           | 4                         |
| PFCIRM121_07195 | 3270    | Shaving | Serine protease                                                                  | Protein modification                              | htrA3       | SECRETED                      | 28,200                | -12,450      | 13           | 2                         |
| PFCIRM139_07420 | 3303    | Shaving | Hypothetical protein                                                             | Pouf similar to proteins from other organisms     |             | CYTO                          | 16,900                | -5,565       | 7            | 2                         |
| PFCIRM456_03435 | 3303    | Shaving | Hypothetical protein                                                             | Pouf similar to proteins from other organisms     |             | CYTO                          | 18,700                | -6,769       | 12           | 2                         |
| PFCIRM514_11495 | 3303    | Shaving | Hypothetical protein                                                             | Pouf similar to proteins from other organisms     |             | CYTO                          | 18,700                | -23,980      | 38           | 6                         |
| PFCIRM516_04745 | 3303    | Shaving | Hypothetical protein                                                             | Pouf similar to proteins from other organisms     |             | CYTO                          | 20,200                | -13,812      | 29           | 3                         |
| PFCIRM514_02045 | 3384    | Shaving | Surface layer protein D (S-layer protein D)                                      | Cell wall                                         |             | PSE                           | 23,400                | -4,052       | 12           | 2                         |
| PFCIRM516_01510 | 3384    | Shaving | Surface layer protein D (S-layer protein D)                                      | Cell wall                                         |             | PSE                           | 23,300                | -6,101       | 14           | 2                         |
| PFCIRM118_04375 | 3396    | Shaving | Dihydrolipoamide acyltransferase, E2 component of pyruvate dehydrogenase complex | Metabolism of carbohydrates and related molecules | pdhB        | CYTO                          | 59,500                | -18,724      | 3            | 2                         |
| PFCIRM129_12235 | 3671    | CyDye   | Putative minor extracellular serine protease                                     | Cell wall                                         |             | PSE                           | 145,500               | -14,114      | 2            | 2                         |
| PFCIRM118_06410 | 3671    | ClGua   | Putative minor extracellular serine protease                                     | Cell wall                                         |             | PSE                           | 149,600               | -161,828     | 29           | 25                        |
| PFCIRM122_05375 | 3671    | ClGua   | Putative minor extracellular serine protease                                     | Cell wall                                         |             | PSE                           | 149,600               | -201,445     | 37           | 35                        |
| PFCIRM129_12235 | 3671    | ClGua   | Putative minor extracellular serine protease                                     | Cell wall                                         |             | PSE                           | 145,500               | -186,148     | 35           | 32                        |
| PFCIRM134_02360 | 3671    | ClGua   | Putative minor extracellular serine protease                                     | Cell wall                                         |             | PSE                           | 145,500               | -166,301     | 36           | 31                        |
| PFCIRM118_06410 | 3671    | Shaving | Putative minor extracellular serine protease                                     | Cell wall                                         |             | PSE                           | 149,600               | -150,421     | 31           | 28                        |
| PFCIRM122_05375 | 3671    | Shaving | Putative minor extracellular serine protease                                     | Cell wall                                         |             | PSE                           | 149,600               | -351,997     | 57           | 61                        |
| PFCIRM129_12235 | 3671    | Shaving | Putative minor extracellular serine protease                                     | Cell wall                                         |             | PSE                           | 145,500               | -290,700     | 51           | 54                        |
| PFCIRM134_02360 | 3671    | Shaving | Putative minor extracellular serine protease                                     | Cell wall                                         |             | PSE                           | 145,500               | -357,444     | 58           | 67                        |

| Locus Tag       | Cluster | Method  | Description                                                                         | Function                                      | Gene name | SurfG+ Predicted Localization | Molecular Weight (Da) | log(E value) | Coverage (%) | Number Of Unique Peptides |
|-----------------|---------|---------|-------------------------------------------------------------------------------------|-----------------------------------------------|-----------|-------------------------------|-----------------------|--------------|--------------|---------------------------|
| PFCIRM129_05625 | 3715    | Shaving | tRNA nucleotidyltransferase PcnB                                                    | RNA modification                              | pcnB      | CYTO                          | 36,000                | -9,333       | 9            | 2                         |
| PFCIRM134_02110 | 3715    | Shaving | tRNA nucleotidyltransferase PcnB                                                    | RNA modification                              | pcnB      | CYTO                          | 36,000                | -12,792      | 23           | 5                         |
| PFCIRM139_07670 | 3715    | Shaving | tRNA nucleotidyltransferase PcnB                                                    | RNA modification                              | pcnB      | CYTO                          | 36,000                | -18,578      | 22           | 5                         |
| PFCIRM456_06470 | 3715    | Shaving | tRNA nucleotidyltransferase PcnB                                                    | RNA modification                              | pcnB      | CYTO                          | 37,600                | -38,010      | 33           | 7                         |
| PFCIRM514_09515 | 3715    | Shaving | tRNA nucleotidyltransferase PcnB                                                    | RNA modification                              | pcnB      | CYTO                          | 37,600                | -23,276      | 25           | 6                         |
| PFCIRM516_00160 | 3715    | Shaving | tRNA nucleotidyltransferase PcnB                                                    | RNA modification                              | pcnB      | CYTO                          | 37,600                | -15,114      | 17           | 4                         |
| PFCIRM118_05310 | 3762    | CyDye   | Chaperone clpB 2 (ATP-dependent Clp protease B2) (Clp chaperone)                    | Protein folding                               | clpB 2    | CYTO                          | 94,200                | -139,775     | 37           | 28                        |
| PFCIRM118_05310 | 3762    | Shaving | Chaperone clpB 2 (ATP-dependent Clp protease B2) (Clp chaperone)                    | Protein folding                               | clpB 2    | CYTO                          | 94,200                | -33,590      | 11           | 8                         |
| PFCIRM129_06355 | 3762    | Shaving | Chaperone clpB 2 (ATP-dependent Clp protease B2) (Clp chaperone)                    | Protein folding                               | clpB 2    | CYTO                          | 94,200                | -7,560       | 3            | 2                         |
| PFCIRM139_01270 | 3762    | Shaving | Chaperone clpB 2 (ATP-dependent Clp protease B2) (Clp chaperone)                    | Protein folding                               | clpB 2    | CYTO                          | 94,200                | -12,370      | 4            | 3                         |
| PFCIRM139_01295 | 3767    | Shaving | Trypsin-like serine protease Phosphoribosyltransferase/nitroreductase (fusion gene) | Metabolism of coenzymes and prosthetic groups | htrA1     | PSE                           | 35,900                | -10,434      | 7            | 2                         |
| PFCIRM118_06850 | 3980    | Shaving | Hypothetical protein                                                                | Pouf, without similarity to other proteins    | bluB/cobT | CYTO                          | 66,300                | -10,040      | 4            | 2                         |
| PFCIRM516_06285 | 5421    | Shaving | Hypothetical protein                                                                | Pouf, without similarity to other proteins    |           | PSE                           | 17,900                | -14,724      | 23           | 3                         |
| PFCIRM1_03640   | 5421    | Shaving | Hypothetical protein                                                                | Pouf, without similarity to other proteins    |           | PSE                           | 18,200                | -17,298      | 22           | 2                         |
| PFCIRM134_10560 | 7120    | Shaving | secreted protein of unknown function                                                | Pouf similar to proteins from other organisms |           | PSE                           | 17,600                | -10,481      | 17           | 3                         |
| PFCIRM514_09845 | 7120    | Shaving | secreted protein of unknown function                                                | Pouf similar to proteins from other organisms |           | PSE                           | 17,600                | -8,014       | 20           | 2                         |
| PFCIRM516_06675 | 8306    | Shaving | Hypothetical transmembrane protein                                                  | Pouf similar to proteins from other organisms |           | PSE                           | 75,000                | -7,218       | 2            | 2                         |
| PFCIRM516_11635 | 9372    | CyDye   | L-Lactate dehydrogenase                                                             | Main glycolytic pathways                      | ldh1      | CYTO                          | 96,900                | -34,801      | 10           | 6                         |
| PFCIRM1_08705   | 9372    | CyDye   | L-Lactate dehydrogenase                                                             | Main glycolytic pathways                      | alaS      | CYTO                          | 96,900                | -43,980      | 19           | 11                        |
| PFCIRM118_09005 | 9372    | CyDye   | Alanyl-tRNA synthetase (Alanine-tRNA ligase)                                        | Aminoacyl-tRNA synthetases                    | alaS      | CYTO                          | 96,900                | -39,090      | 11           | 7                         |
| PFCIRM456_02790 | 9429    | Shaving | Protein of unknown function                                                         | Pouf similar to proteins from other organisms |           | PSE                           | 17,800                | -48,914      | 33           | 12                        |
| PFCIRM516_11920 | 9429    | Shaving | Protein of unknown function                                                         | Pouf similar to proteins from other organisms |           | PSE                           | 17,800                | -27,646      | 31           | 9                         |
| PFCIRM139_00285 | 10195   | CyDye   | large surface protein A                                                             | Cell wall                                     | ispA      | SECRETED                      | 115,100               | -6,843       | 4            | 3                         |
| PFCIRM456_04910 | 10195   | CyDye   | large surface protein A                                                             | Cell wall                                     | ispA      | SECRETED                      | 115,200               | -10,983      | 4            | 4                         |
| PFCIRM516_06620 | 10195   | CyDye   | large surface protein A                                                             | Cell wall                                     | ispA      | SECRETED                      | 109,800               | -62,858      | 18           | 15                        |
| PFCIRM139_00285 | 10195   | ClGua   | large surface protein A                                                             | Cell wall                                     | ispA      | SECRETED                      | 115,100               | -40,628      | 11           | 8                         |
| PFCIRM456_04910 | 10195   | ClGua   | large surface protein A                                                             | Cell wall                                     | ispA      | SECRETED                      | 115,200               | -41,427      | 11           | 9                         |
| PFCIRM516_06620 | 10195   | ClGua   | large surface protein A                                                             | Cell wall                                     | ispA      | SECRETED                      | 109,800               | -66,200      | 14           | 13                        |
| PFCIRM139_00285 | 10195   | Shaving | large surface protein A                                                             | Cell wall                                     | ispA      | SECRETED                      | 115,100               | -173,273     | 37           | 29                        |
| PFCIRM456_04910 | 10195   | Shaving | large surface protein A                                                             | Cell wall                                     | ispA      | SECRETED                      | 115,200               | -260,481     | 57           | 46                        |
| PFCIRM516_06620 | 10195   | Shaving | large surface protein A                                                             | Cell wall                                     | ispA      | SECRETED                      | 109,800               | -108,848     | 32           | 21                        |
| PFCIRM121_09990 | 12131   | Shaving | Leucine Rich Repeat domain protein                                                  |                                               |           | SECRETED                      | 113,700               | -49,415      | 22           | 14                        |
| PFCIRM527_06820 | 12131   | Shaving | Leucine Rich Repeat domain protein                                                  |                                               |           | SECRETED                      | 113,700               | -59,646      | 20           | 13                        |
| PFCIRM527_04630 | 13599   | Shaving | Putative uncharacterized protein                                                    |                                               |           | CYTO                          | 14,900                | -29,389      | 43           | 5                         |
| PFCIRM118_01980 | 14274   | Shaving | Periplasmic binding protein                                                         |                                               |           | SECRETED                      | 36,400                | -12,126      | 13           | 2                         |
| PFCIRM134_09660 | 14274   | Shaving | Periplasmic binding protein                                                         |                                               |           | SECRETED                      | 36,300                | -75,013      | 46           | 12                        |

| Locus Tag       | Cluster | Method  | Description                                 | Function                                      | Gene name | SurfG+ Predicted Localization | Molecular Weight (Da) | log(E value) | Coverage (%) | Number Of Unique Peptides |
|-----------------|---------|---------|---------------------------------------------|-----------------------------------------------|-----------|-------------------------------|-----------------------|--------------|--------------|---------------------------|
| PFCIRM122_04010 | 14403   | CyDye   | surface layer protein B (S-layer protein B) | Cell wall                                     | slpB      | PSE                           | 56,500                | -19,426      | 21           | 9                         |
| PFCIRM129_00700 | 14403   | CyDye   | surface layer protein B (S-layer protein B) | Cell wall                                     | slpB      | PSE                           | 56,800                | -46,061      | 27           | 14                        |
| PFCIRM118_02660 | 14403   | CyDye   | surface layer protein B (S-layer protein B) | Cell wall                                     | slpB      | PSE                           | 56,500                | -19,294      | 15           | 5                         |
| PFCIRM118_02660 | 14403   | ClGua   | surface layer protein B (S-layer protein B) | Cell wall                                     | slpB      | PSE                           | 56,500                | -81,925      | 34           | 13                        |
| PFCIRM122_04010 | 14403   | ClGua   | surface layer protein B (S-layer protein B) | Cell wall                                     | slpB      | PSE                           | 56,500                | -23,222      | 20           | 7                         |
| PFCIRM129_00700 | 14403   | ClGua   | surface layer protein B (S-layer protein B) | Cell wall                                     | slpB      | PSE                           | 56,800                | -78,076      | 40           | 18                        |
| PFCIRM118_02660 | 14403   | Shaving | surface layer protein B (S-layer protein B) | Cell wall                                     | slpB      | PSE                           | 56,500                | -178,095     | 41           | 32                        |
| PFCIRM122_04010 | 14403   | Shaving | surface layer protein B (S-layer protein B) | Cell wall                                     | slpB      | PSE                           | NA                    | -92,900      | NA           | 23                        |
| PFCIRM129_00700 | 14403   | Shaving | surface layer protein B (S-layer protein B) | Cell wall                                     | slpB      | PSE                           | 56,800                | -189,520     | 42           | 33                        |
| PFCIRM122_04005 | 14404   | Shaving | Protein of unknown function                 | Pouf, without similarity to other proteins    |           | PSE                           | 36,100                | -11,028      | 7            | 2                         |
| PFCIRM129_00705 | 14404   | Shaving | Protein of unknown function                 | Pouf, without similarity to other proteins    |           | PSE                           | 36,600                | -9,523       | 8            | 2                         |
| PFCIRM134_00845 | 14532   | CyDye   | Transcriptional regulatory protein          | Transcription regulation                      | glnR      | CYTO                          | NA                    | -52,024      | NA           | 12                        |
| PFCIRM139_02295 | 14532   | CyDye   | Transcriptional regulatory protein          | Transcription regulation                      | glnR      | CYTO                          | 39,100                | -19,075      | 20           | 5                         |
| PFCIRM456_06975 | 14532   | CyDye   | Transcriptional regulatory protein          | Transcription regulation                      | glnR      | CYTO                          | 39,100                | -18,026      | 31           | 5                         |
| PFCIRM514_02665 | 14532   | CyDye   | Transcriptional regulatory protein          | Transcription regulation                      | glnR      | CYTO                          | 39,100                | -57,960      | 43           | 12                        |
| PFCIRM118_03315 | 14532   | CyDye   | inositol-1-phosphate synthase               | Specific carbohydrate metabolic pathway       |           | CYTO                          | 39,100                | -61,313      | 45           | 11                        |
| PFCIRM527_04635 | 14532   | CyDye   | inositol-1-phosphate synthase               | Specific carbohydrate metabolic pathway       |           | CYTO                          | 39,100                | -55,437      | 40           | 11                        |
| PFCIRM118_03315 | 14532   | Shaving | Transcriptional regulatory protein          | Transcription regulation                      | glnR      | CYTO                          | 39,100                | -19,205      | 16           | 4                         |
| PFCIRM118_03320 | 14532   | Shaving | Transcriptional regulatory protein          | Transcription regulation                      | glnR      | CYTO                          | 18,300                | -19,981      | 27           | 3                         |
| PFCIRM121_02375 | 14532   | Shaving | Transcriptional regulatory protein          | Transcription regulation                      | glnR      | CYTO                          | 18,300                | -50,239      | 49           | 7                         |
| PFCIRM134_00845 | 14532   | Shaving | Transcriptional regulatory protein          | Transcription regulation                      | glnR      | CYTO                          | 39,100                | -10,237      | 8            | 2                         |
| PFCIRM139_02295 | 14532   | Shaving | Transcriptional regulatory protein          | Transcription regulation                      | glnR      | CYTO                          | 39,100                | -17,482      | 12           | 3                         |
| PFCIRM456_06975 | 14532   | Shaving | Transcriptional regulatory protein          | Transcription regulation                      | glnR      | CYTO                          | 39,100                | -13,565      | 8            | 2                         |
| PFCIRM139_00025 | 17478   | Shaving | Protein of unknown function                 | Pouf, without similarity to other proteins    |           | CYTO                          | 30,700                | -10,699      | 20           | 2                         |
| PFCIRM139_02065 | 17495   | Shaving | Protein of unknown function                 | Pouf, without similarity to other proteins    |           | CYTO                          | 35,300                | -5,680       | 8            | 2                         |
| PFCIRM121_05625 | 19508   | ClGua   | large surface protein A                     | Cell wall                                     | lspA      | SECRETED                      | 137,100               | -37,437      | 9            | 8                         |
| PFCIRM121_05625 | 19508   | Shaving | large surface protein A                     | Cell wall                                     | lspA      | SECRETED                      | 137,100               | -134,232     | 24           | 27                        |
| PFCIRM139_01875 | 44324   | Shaving | Putative uncharacterized protein            |                                               |           | SECRETED                      | 15,300                | -31,154      | 56           | 7                         |
| PFCIRM139_01925 | 44334   | Shaving | Putative uncharacterized protein            |                                               |           | CYTO                          | 29,600                | -14,677      | 19           | 3                         |
| PFCIRM456_06970 | 47711   | Shaving | Protein of unknown function                 | Pouf similar to proteins from other organisms |           | CYTO                          | 16,100                | -46,790      | 56           | 7                         |

| Locus Tag       | Cluster | Method  | Description | Function                          | Gene name | SurfG+ Predicted Localization | Molecular Weight (Da) | log(E value) | Coverage (%) | Number Of Unique Peptides |
|-----------------|---------|---------|-------------|-----------------------------------|-----------|-------------------------------|-----------------------|--------------|--------------|---------------------------|
| PFCIRM138_06935 | ND      | CyDye   | ND          | Adaptation to atypical conditions | ND        | ND                            | 19,100                | -14,201      | 28           | 4                         |
| PFCIRM138_07450 | ND      | CyDye   | ND          |                                   | ND        | ND                            | 34,100                | -10,985      | 7            | 2                         |
| PFCIRM122_11065 | ND      | CyDye   | ND          |                                   | ND        | ND                            | NA                    | -20,250      | NA           | 7                         |
| PFCIRM122_04025 | ND      | CyDye   | ND          |                                   | ND        | ND                            | NA                    | -20,250      | NA           | 7                         |
| PFCIRM134_05115 | ND      | CyDye   | ND          |                                   | ND        | ND                            | NA                    | -56,055      | NA           | 15                        |
| PFCIRM134_08980 | ND      | CyDye   | ND          |                                   | ND        | ND                            | NA                    | -56,055      | NA           | 15                        |
| PFCIRM134_05120 | ND      | CyDye   | ND          |                                   | ND        | ND                            | NA                    | -56,055      | NA           | 15                        |
| PFCIRM134_08985 | ND      | CyDye   | ND          |                                   | ND        | ND                            | NA                    | -58,238      | NA           | 15                        |
| PFCIRM139_10980 | ND      | CyDye   | ND          |                                   | ND        | ND                            | NA                    | -25,500      | NA           | 8                         |
| PFCIRM129_03685 | ND      | CIgua   | ND          |                                   | ND        | ND                            | NA                    | -16,409      | NA           | 3                         |
| PFCIRM129_03680 | ND      | CIgua   | ND          |                                   | ND        | ND                            | NA                    | -16,400      | NA           | 3                         |
| PFCIRM134_01655 | ND      | CIgua   | ND          |                                   | ND        | ND                            | NA                    | -24,126      | NA           | 5                         |
| PFCIRM134_12765 | ND      | CIgua   | ND          |                                   | ND        | ND                            | NA                    | -24,126      | NA           | 5                         |
| PFCIRM138_06935 | ND      | CIgua   | ND          |                                   | ND        | ND                            | NA                    | -35,455      | NA           | 7                         |
| PFCIRM514_09110 | ND      | CIgua   | ND          |                                   | ND        | ND                            | NA                    | -44,732      | NA           | 10                        |
| PFCIRM514_09085 | ND      | CIgua   | ND          |                                   | ND        | ND                            | NA                    | -44,732      | NA           | 10                        |
| PFCIRM118_01020 | ND      | Shaving | ND          |                                   |           | ND                            | ND                    | NA           | -15,930      | NA                        |
| PFCIRM118_01025 | ND      | Shaving | ND          | ND                                |           | ND                            | NA                    | -15,930      | NA           | 3                         |
| PFCIRM122_11065 | ND      | Shaving | ND          | ND                                |           | ND                            | NA                    | -51,700      | NA           | 12                        |
| PFCIRM122_04025 | ND      | Shaving | ND          | rimM                              |           | ND                            | NA                    | -51,700      | NA           | 12                        |
| PFCIRM129_03680 | ND      | Shaving | ND          | ND                                |           | ND                            | NA                    | -111,600     | NA           | 16                        |
| PFCIRM129_03685 | ND      | Shaving | ND          | ND                                |           | ND                            | NA                    | -111,600     | NA           | 16                        |
| PFCIRM129_05040 | ND      | Shaving | ND          | ND                                |           | ND                            | NA                    | -10,200      | NA           | 2                         |
| PFCIRM134_01655 | ND      | Shaving | ND          | ND                                |           | ND                            | NA                    | -69,100      | NA           | 13                        |
| PFCIRM134_12765 | ND      | Shaving | ND          | ND                                |           | ND                            | NA                    | -69,100      | NA           | 13                        |
| PFCIRM134_07870 | ND      | Shaving | ND          | ND                                |           | ND                            | NA                    | -11,400      | NA           | 3                         |
| PFCIRM134_07875 | ND      | Shaving | ND          | ND                                |           | ND                            | NA                    | -11,400      | NA           | 3                         |
| PFCIRM138_06935 | ND      | Shaving | ND          | ND                                |           | ND                            | NA                    | -4,300       | NA           | 2                         |
| PFCIRM138_07450 | ND      | Shaving | ND          | ND                                |           | ND                            | NA                    | -4,300       | NA           | 2                         |
| PFCIRM139_08365 | ND      | Shaving | ND          | ND                                |           | ND                            | NA                    | -66,700      | NA           | 13                        |
| PFCIRM514_09085 | ND      | Shaving | ND          | ND                                |           | ND                            | NA                    | -243,800     | NA           | 48                        |
| PFCIRM514_09110 | ND      | Shaving | ND          | ND                                |           | ND                            | NA                    | -243,800     | NA           | 48                        |
| PFCIRM527_10380 | ND      | Shaving | ND          | ND                                |           | ND                            | NA                    | -62,900      | NA           | 14                        |
| PFCIRM527_05765 | ND      | Shaving | ND          | ND                                |           | ND                            | NA                    | -62,900      | NA           | 14                        |
